# Supplementary material for: Transcriptional Profiling Uncovers a Network of Cholesterol-Responsive Atherosclerosis Target Genes
Source: PLoS Genet. 2008 Mar 14;4(3):e1000036. doi: 10.1371/journal.pgen.1000036 (PMC2265530; doi:10.1371/journal.pgen.1000036)
Supplement: Table S2 — Textmining list, Macrophages (0.32 MB XLS) [file pgen.1000036.s003.xls]

## Sheet: Table S2 - macrophage  list
Table S2 - Textmining list, Macrophages
MGI	GeneSymbol	Gene name
MGI:101757	Cfl1	cofilin 1, non-muscle
MGI:101761	Hmga2	high mobility group AT-hook 2
MGI:101762	Elk3	ELK3, member of ETS oncogene family
MGI:101765	Cdk5	cyclin-dependent kinase 5
MGI:101772	Snta1	syntrophin, acidic 1
MGI:101773	Cd86	CD86 antigen
MGI:101774	Cd79a	CD79A antigen (immunoglobulin-associated alpha)
MGI:101775	Cd80	CD80 antigen
MGI:101780	Serpine2	serine (or cysteine) peptidase inhibitor, clade E, member 2
MGI:101783	Plk4	polo-like kinase 4 (Drosophila)
MGI:101784	Nes	nestin
MGI:101785	Mybl2	myeloblastosis oncogene-like 2
MGI:101791	Isl1	ISL1 transcription factor, LIM/homeodomain (islet 1)
MGI:101802	F2r	coagulation factor II (thrombin) receptor
MGI:101825	D16H22S680E	DNA segment, Chr 16, human D22S680E, expressed
MGI:101838	Tbp	TATA box binding protein
MGI:101848	Gnb5	guanine nucleotide binding protein, beta 5
MGI:101849	Gnb2l1	guanine nucleotide binding protein (G protein), beta polypeptide 2 like 1
MGI:101865	Srms	src-related kinase lacking C-terminal regulatory tyrosine and N-terminal myristylation sites
MGI:101877	Tcf12	transcription factor 12
MGI:101878	Ccl8	chemokine (C-C motif) ligand 8
MGI:101884	Ppard	peroxisome proliferator activator receptor delta
MGI:101893	Pou5f1	POU domain, class 5, transcription factor 1
MGI:101899	Pla2g5	phospholipase A2, group V
MGI:101900	Mmp14	matrix metallopeptidase 14 (membrane-inserted)
MGI:101901	Klra7	killer cell lectin-like receptor, subfamily A, member 7
MGI:101904	Klra4	killer cell lectin-like receptor, subfamily A, member 4
MGI:101905	Klra3	killer cell lectin-like receptor, subfamily A, member 3
MGI:101907	Klra1	killer cell lectin-like receptor, subfamily A, member 1
MGI:101911	Dusp2	dual specificity phosphatase 2
MGI:101914	Calb2	calbindin 2
MGI:101916	Fabp7	fatty acid binding protein 7, brain
MGI:101920	Ap2a2	adaptor protein complex AP-2, alpha 2 subunit
MGI:101924	Slc12a2	solute carrier family 12, member 2
MGI:101925	Krt1-13	keratin complex 1, acidic, gene 13
MGI:101931	Slc1a2	solute carrier family 1 (glial high affinity glutamate transporter), member 2
MGI:101932	Cpe	carboxypeptidase E
MGI:101939	Hmgcs2	3-hydroxy-3-methylglutaryl-Coenzyme A synthase 2
MGI:101940	Arhgdib	Rho, GDP dissociation inhibitor (GDI) beta
MGI:101941	E2f1	E2F transcription factor 1
MGI:101947	Hnrpd	heterogeneous nuclear ribonucleoprotein D
MGI:101950	Calcr	calcitonin receptor
MGI:102462	Slc9a1	solute carrier family 9 (sodium/hydrogen exchanger), member 1
MGI:102463	Nfatc2	nuclear factor of activated T-cells, cytoplasmic, calcineurin-dependent 2
MGI:102469	Nfatc1	nuclear factor of activated T-cells, cytoplasmic, calcineurin-dependent 1
MGI:102518	Adam3	a disintegrin and metallopeptidase domain 3 (cyritestin)
MGI:102519	Cst3	cystatin C
MGI:102547	Fau	Finkel-Biskis-Reilly murine sarcoma virus (FBR-MuSV) ubiquitously expressed (fox derived)
MGI:102552	Crisp3	cysteine-rich secretory protein 3
MGI:102563	Dct	dopachrome tautomerase
MGI:102570	Ndph	Norrie disease homolog
MGI:102666	Ppp5c	protein phosphatase 5, catalytic subunit
MGI:102670	Ddx4	DEAD (Asp-Glu-Ala-Asp) box polypeptide 4
MGI:102682	Llglh	lethal giant larvae homolog
MGI:102696	Pip	prolactin induced protein
MGI:102700	Itga7	integrin alpha 7
MGI:102702	Gp49a	glycoprotein 49 A
MGI:102706	Fdft1	farnesyl diphosphate farnesyl transferase 1
MGI:102708	Efnb1	ephrin B1
MGI:102709	Cav1	caveolin, caveolae protein 1
MGI:102720	Ednrb	endothelin receptor type B
MGI:102744	Rdbp	RD RNA-binding protein
MGI:102759	Prss2	protease, serine, 2
MGI:102763	Smr1	submaxillary gland androgen regulated protein 1
MGI:102765	Ptprn	protein tyrosine phosphatase, receptor type, N
MGI:102768	Mfge8	milk fat globule-EGF factor 8 protein
MGI:102791	Rds	retinal degeneration, slow (retinitis pigmentosa 7)
MGI:102794	Akap4	A kinase (PRKA) anchor protein 4
MGI:102797	Acsl1	acyl-CoA synthetase long-chain family member 1
MGI:102805	Entpd1	ectonucleoside triphosphate diphosphohydrolase 1
MGI:102811	Lmo2	LIM domain only 2
MGI:102845	Bdkrb2	bradykinin receptor, beta 2
MGI:102848	Serpina3c	serine (or cysteine) peptidase inhibitor, clade A, member 3C
MGI:102850	Klk6	kallikrein 6
MGI:102853	Elk4	ELK4, member of ETS oncogene family
MGI:102858	Fosl2	fos-like antigen 2
MGI:102889	Cspg2	chondroitin sulfate proteoglycan 2
MGI:102935	Pou6f1	POU domain, class 6, transcription factor 1
MGI:102949	Foxn1	forkhead box N1
MGI:102956	Cdk7	cyclin-dependent kinase 7 (homolog of Xenopus MO15 cdk-activating kinase)
MGI:102967	Mtnr1a	melatonin receptor 1A
MGI:103009	Epb4.1l2	erythrocyte protein band 4.1-like 2
MGI:103011	Ccr7	chemokine (C-C motif) receptor 7
MGI:103017	Fcgrt	Fc receptor, IgG, alpha chain transporter
MGI:103036	Stat5a	signal transducer and activator of transcription 5A
MGI:103038	Stat3	signal transducer and activator of transcription 3
MGI:103070	H2-Ab1	histocompatibility 2, class II antigen A, beta 1
MGI:103079	Pura	purine rich element binding protein A
MGI:103098	Gp38	glycoprotein 38
MGI:103107	F10	coagulation factor X
MGI:103118	Btn1a1	butyrophilin, subfamily 1, member A1
MGI:103123	Serpinb6a	serine (or cysteine) peptidase inhibitor, clade B, member 6a
MGI:103147	Dnchc1	dynein, cytoplasmic, heavy chain 1
MGI:103156	Gabrg1	gamma-aminobutyric acid (GABA-A) receptor, subunit gamma 1
MGI:103157	Dnase1	deoxyribonuclease I
MGI:103159	Cish	cytokine inducible SH2-containing protein
MGI:103169	Scn8a	sodium channel, voltage-gated, type VIII, alpha
MGI:103170	Gfi1	growth factor independent 1
MGI:103177	Mpz	myelin protein zero
MGI:103181	Sod3	superoxide dismutase 3, extracellular
MGI:103187	Nqo1	NAD(P)H dehydrogenase, quinone 1
MGI:103189	Mmp7	matrix metallopeptidase 7
MGI:103198	Cdc25a	cell division cycle 25 homolog A (S. cerevisiae)
MGI:103239	Tcfap4	transcription factor AP4
MGI:103241	Slk	STE20-like kinase (yeast)
MGI:103248	Phc1	polyhomeotic-like 1 (Drosophila)
MGI:103257	Inpp5b	inositol polyphosphate-5-phosphatase B
MGI:103263	Mcf2l	mcf.2 transforming sequence-like
MGI:103264	Arhgef2	rho/rac guanine nucleotide exchange factor (GEF) 2
MGI:103267	Eif4ebp1	eukaryotic translation initiation factor 4E binding protein 1
MGI:103268	Dnajc1	DnaJ (Hsp40) homolog, subfamily C, member 1
MGI:103270	Tcfeb	transcription factor EB
MGI:103288	Rpo1-1	RNA polymerase 1-1
MGI:103290	Rela	v-rel reticuloendotheliosis viral oncogene homolog A (avian)
MGI:103291	Rai1	retinoic acid induced 1
MGI:103295	Pon1	paraoxonase 1
MGI:103297	Atp7b	ATPase, Cu++ transporting, beta polypeptide
MGI:103300	Rbl1	retinoblastoma-like 1 (p107)
MGI:103302	Bmp7	bone morphogenetic protein 7
MGI:103305	Alk	anaplastic lymphoma kinase
MGI:103307	Cacnb3	calcium channel, voltage-dependent, beta 3 subunit
MGI:103309	Flot2	flotillin 2
MGI:103556	Cxcl12	chemokine (C-X-C motif) ligand 12
MGI:103559	Sox18	SRY-box containing gene 18
MGI:103561	Kpna2	karyopherin (importin) alpha 2
MGI:103567	Blr1	Burkitt lymphoma receptor 1
MGI:103575	Skp1a	S-phase kinase-associated protein 1A
MGI:103576	Ccl11	small chemokine (C-C motif) ligand 11
MGI:103577	Hand1	heart and neural crest derivatives expressed transcript 1
MGI:103580	Hand2	heart and neural crest derivatives expressed transcript 2
MGI:104311	Ptger4	prostaglandin E receptor 4 (subtype EP4)
MGI:104513	Nqo2	NAD(P)H dehydrogenase, quinone 2
MGI:104528	S100g	S100 calcium binding protein G
MGI:104533	Ccl9	chemokine (C-C motif) ligand 9
MGI:104540	Clec3b	C-type lectin domain family 3, member b
MGI:104555	Mafb	v-maf musculoaponeurotic fibrosarcoma oncogene family, protein B (avian)
MGI:104556	Cdkn1a	cyclin-dependent kinase inhibitor 1A (P21)
MGI:104557	Rps6ka3	ribosomal protein S6 kinase polypeptide 3
MGI:104558	Rps6ka1	ribosomal protein S6 kinase polypeptide 1
MGI:104559	Rcn1	reticulocalbin 1
MGI:104563	Napa	N-ethylmaleimide sensitive fusion protein attachment protein alpha
MGI:104564	Cdkn1c	cyclin-dependent kinase inhibitor 1C (P57)
MGI:104565	Cdkn1b	cyclin-dependent kinase inhibitor 1B (P27)
MGI:104568	Hcls1	hematopoietic cell specific Lyn substrate 1
MGI:104574	Ptprj	protein tyrosine phosphatase, receptor type, J
MGI:104580	Rapgef1	Rap guanine nucleotide exchange factor (GEF) 1
MGI:104596	Procr	protein C receptor, endothelial
MGI:104615	Cnr1	cannabinoid receptor 1 (brain)
MGI:104616	Ccr3	chemokine (C-C motif) receptor 3
MGI:104618	Ccr1	chemokine (C-C motif) receptor 1
MGI:104629	Penk1	preproenkephalin 1
MGI:104638	Tff3	trefoil factor 3, intestinal
MGI:104641	Ptx3	pentraxin related gene
MGI:104642	Pla2g2a	phospholipase A2, group IIA (platelets, synovial fluid)
MGI:104651	Kai1	kangai 1 (suppression of tumorigenicity 6, prostate)
MGI:104652	Capzb	capping protein (actin filament) muscle Z-line, beta
MGI:104654	Atoh1	atonal homolog 1 (Drosophila)
MGI:104659	Dll1	delta-like 1 (Drosophila)
MGI:104665	Soat1	sterol O-acyltransferase 1
MGI:104670	Fkbp5	FK506 binding protein 5
MGI:104671	Tcfap2a	transcription factor AP-2, alpha
MGI:104673	Ptpn12	protein tyrosine phosphatase, non-receptor type 12
MGI:104681	Hgs	HGF-regulated tyrosine kinase substrate
MGI:104686	Crkl	v-crk sarcoma virus CT10 oncogene homolog (avian)-like
MGI:104694	Cspg3	chondroitin sulfate proteoglycan 3
MGI:104697	Muc5ac	mucin 5, subtypes A and C, tracheobronchial/gastric
MGI:104698	Lim2	lens intrinsic membrane protein 2
MGI:104717	Meis1	myeloid ecotropic viral integration site 1
MGI:104719	Ndst1	N-deacetylase/N-sulfotransferase (heparan glucosaminyl) 1
MGI:104732	Rbmy1a1	RNA binding motif protein, Y chromosome, family 1, member A1
MGI:104735	Gt(ROSA)26Sor	gene trap ROSA 26, Philippe Soriano
MGI:104737	Cdkn2b	cyclin-dependent kinase inhibitor 2B (p15, inhibits CDK4)
MGI:104738	Cdkn2a	cyclin-dependent kinase inhibitor 2A
MGI:104740	Ppara	peroxisome proliferator activated receptor alpha
MGI:104742	Kcnj3	potassium inwardly-rectifying channel, subfamily J, member 3
MGI:104744	Kcnj2	potassium inwardly-rectifying channel, subfamily J, member 2
MGI:104752	Nfkbib	nuclear factor of kappa light chain gene enhancer in B-cells inhibitor, beta
MGI:104754	Snf1lk	SNF1-like kinase
MGI:104757	Ephb4	Eph receptor B4
MGI:104767	Gpx4	glutathione peroxidase 4
MGI:104768	Gast	gastrin
MGI:104771	Erbb4	v-erb-a erythroblastic leukemia viral oncogene homolog 4 (avian)
MGI:104779	Prkdc	protein kinase, DNA activated, catalytic polypeptide
MGI:104793	Cbfa2t1h	CBFA2T1 identified gene homolog (human)
MGI:104796	Ltb	lymphotoxin B
MGI:104797	Lta	lymphotoxin A
MGI:104807	Pls3	plastin 3 (T-isoform)
MGI:104808	Lcp1	lymphocyte cytosolic protein 1
MGI:104810	Plaa	phospholipase A2, activating protein
MGI:104811	Sub1	SUB1 homolog (S. cerevisia
MGI:104814	Ier3	immediate early response 3
MGI:104815	Ier2	immediate early response 2
MGI:104820	Hnrpa1	heterogeneous nuclear ribonucleoprotein A1
MGI:104849	Daf2	decay accelerating factor 2
MGI:104850	Daf1	decay accelerating factor 1
MGI:104860	Fxr1h	fragile X mental retardation gene 1, autosomal homolog
MGI:104872	Ppp1cc	protein phosphatase 1, catalytic subunit, gamma isoform
MGI:104874	Akt2	thymoma viral proto-oncogene 2
MGI:104875	Ltbr	lymphotoxin B receptor
MGI:104879	Pdcd1	programmed cell death 1
MGI:104880	Psmb6	proteasome (prosome, macropain) subunit, beta type 6
MGI:104883	Psma3	proteasome (prosome, macropain) subunit, alpha type 3
MGI:104884	Psmb1	proteasome (prosome, macropain) subunit, beta type 1
MGI:104887	Gpx1	glutathione peroxidase 1
MGI:104900	Nup88	nucleoporin 88
MGI:104902	Gpc4	glypican 4
MGI:104903	Gpc3	glypican 3
MGI:104904	Tead2	TEA domain family member 2
MGI:104908	Ptk2b	PTK2 protein tyrosine kinase 2 beta
MGI:104912	Sf3a2	splicing factor 3a, subunit 2
MGI:104913	Abi1	abl-interactor 1
MGI:104963	Npy1r	neuropeptide Y receptor Y1
MGI:104967	Glg1	golgi apparatus protein 1
MGI:104968	Ppox	protoporphyrinogen oxidase
MGI:104975	Il1rap	interleukin 1 receptor accessory protein
MGI:104982	Cebpg	CCAAT/enhancer binding protein (C/EBP), gamma
MGI:104987	Mxd3	Max dimerization protein 3
MGI:104990	Gclc	glutamate-cysteine ligase, catalytic subunit
MGI:104991	Mxd4	Max dimerization protein 4
MGI:104993	Lepr	leptin receptor
MGI:104995	Gclm	glutamate-cysteine ligase , modifier subunit
MGI:105043	Ahr	aryl-hydrocarbon receptor
MGI:105046	Serpina3g	serine (or cysteine) peptidase inhibitor, clade A, member 3G
MGI:105049	P2ry1	purinergic receptor P2Y, G-protein coupled 1
MGI:105057	Cdh5	cadherin 5
MGI:105069	Rab4a	RAB4A, member RAS oncogene family
MGI:105075	Slc9a2	solute carrier family 9 (sodium/hydrogen exchanger), member 2
MGI:105077	Hsd17b1	hydroxysteroid (17-beta) dehydrogenase 1
MGI:105081	Tes	testis derived transcript
MGI:105082	Ssr1	signal sequence receptor, alpha
MGI:105083	Slc1a1	solute carrier family 1 (neuronal/epithelial high affinity glutamate transporter, system Xag), member 1
MGI:105085	Rbl2	retinoblastoma-like 2
MGI:105086	Pou2af1	POU domain, class 2, associating factor 1
MGI:105088	Ntn1	netrin 1
MGI:105090	Slc6a5	solute carrier family 6 (neurotransmitter transporter, glycine), member 5
MGI:105093	Cnn2	calponin 2
MGI:105094	Adcyap1	adenylate cyclase activating polypeptide 1
MGI:105095	Pgf	placental growth factor
MGI:105097	Efnb2	ephrin B2
MGI:105107	P2ry2	purinergic receptor P2Y, G-protein coupled 2
MGI:105120	Dusp1	dual specificity phosphatase 1
MGI:105128	Rad23b	RAD23b homolog (S. cerevisiae)
MGI:105303	Il8rb	interleukin 8 receptor, beta
MGI:105304	Il6ra	interleukin 6 receptor, alpha
MGI:105305	Slc1a5	solute carrier family 1 (neutral amino acid transporter), member 5
MGI:105306	Rab5c	RAB5C, member RAS oncogene family
MGI:105367	Il4ra	interleukin 4 receptor, alpha
MGI:105370	Bst1	bone marrow stromal cell antigen 1
MGI:105372	Sstr4	somatostatin receptor 4
MGI:105373	Ptch1	patched homolog 1
MGI:105376	Adam9	a disintegrin and metallopeptidase domain 9 (meltrin gamma)
MGI:105377	Adam19	a disintegrin and metallopeptidase domain 19 (meltrin beta)
MGI:105378	Adam12	a disintegrin and metallopeptidase domain 12 (meltrin alpha)
MGI:105381	Lamr1	laminin receptor 1 (ribosomal protein SA)
MGI:105383	Il18r1	interleukin 18 receptor 1
MGI:105384	Hspa8	heat shock protein 8
MGI:105387	Cdkn2d	cyclin-dependent kinase inhibitor 2D (p19, inhibits CDK4)
MGI:105388	Cdkn2c	cyclin-dependent kinase inhibitor 2C (p18, inhibits CDK4)
MGI:105492	Lair1	leukocyte-associated Ig-like receptor 1
MGI:105870	D15Mit260	DNA Segment, Chr 15 Massachusetts Institute of Technology 260
MGI:105923	Ednra	endothelin receptor type A
MGI:105949	Dcpp	demilune cell and parotid protein
MGI:105975	H2-Bf	histocompatibility 2, complement component factor B
MGI:105976	Myo5a	myosin Va
MGI:105979	G6pdx	glucose-6-phosphate dehydrogenase X-linked
MGI:105983	Ngp	neutrophilic granule protein
MGI:105988	Adam28	a disintegrin and metallopeptidase domain 28
MGI:106008	Anxa5	annexin A5
MGI:106013	Slc16a1	solute carrier family 16 (monocarboxylic acid transporters), member 1
MGI:106015	Cox7a2l	cytochrome c oxidase subunit VIIa polypeptide 2-like
MGI:106021	Sbp	spermine binding protein
MGI:106026	Gstm3	glutathione S-transferase, mu 3
MGI:106028	Rhoc	ras homolog gene family, member C
MGI:106035	Mki67	antigen identified by monoclonal antibody Ki 67
MGI:106066	Ptafr	platelet-activating factor receptor
MGI:106091	Cyp7a1	cytochrome P450, family 7, subfamily a, polypeptide 1
MGI:106179	Shc3	src homology 2 domain-containing transforming protein C3
MGI:106180	Shc2	src homology 2 domain-containing transforming protein C2
MGI:106182	Olfr15	olfactory receptor 15
MGI:106183	Ocln	occludin
MGI:106184	Npm1	nucleophosmin 1
MGI:106185	Ccr2	chemokine (C-C motif) receptor 2
MGI:106190	Bcl11a	B-cell CLL/lymphoma 11A (zinc finger protein)
MGI:106202	Spink3	serine peptidase inhibitor, Kazal type 3
MGI:106203	Skil	SKI-like
MGI:106206	Nrp1	neuropilin 1
MGI:106210	Dmbt1	deleted in malignant brain tumors 1
MGI:106248	Eif5a	eukaryotic translation initiation factor 5A
MGI:106428	Ldhd	lactate dehydrogenase D
MGI:106588	Lag3	lymphocyte-activation gene 3
MGI:106591	Matn1	matrilin 1, cartilage matrix protein 1
MGI:106609	Gpx2	glutathione peroxidase 2
MGI:106645	Enpep	glutamyl aminopeptidase
MGI:106651	Ly6e	lymphocyte antigen 6 complex, locus E
MGI:106653	Tacstd1	tumor-associated calcium signal transducer 1
MGI:106661	Ovgp1	oviductal glycoprotein 1
MGI:106662	Ly75	lymphocyte antigen 75
MGI:106664	C1qr1	complement component 1, q subcomponent, receptor 1
MGI:106675	Adipoq	adiponectin, C1Q and collagen domain containing
MGI:106677	Slc18a2	solute carrier family 18 (vesicular monoamine), member 2
MGI:106903	Gucy2c	guanylate cyclase 2c
MGI:106912	Emr1	EGF-like module containing, mucin-like, hormone receptor-like sequence 1
MGI:106916	Msra	methionine sulfoxide reductase A
MGI:106918	Hif1a	hypoxia inducible factor 1, alpha subunit
MGI:106924	Melk	maternal embryonic leucine zipper kinase
MGI:106925	Cldn11	claudin 11
MGI:106926	Mttp	microsomal triglyceride transfer protein
MGI:107157	Sin3a	transcriptional regulator, SIN3A (yeast)
MGI:107164	Ppp3ca	protein phosphatase 3, catalytic subunit, alpha isoform
MGI:107169	Srp14	signal recognition particle 14
MGI:107173	Serpinf2	serine (or cysteine) peptidase inhibitor, clade F, member 2
MGI:107179	Fosl1	fos-like antigen 1
MGI:107180	Elf1	E74-like factor 1
MGI:107181	Slc26a3	solute carrier family 26, member 3
MGI:107182	Ccr5	chemokine (C-C motif) receptor 5
MGI:107187	Bcl6	B-cell leukemia/lymphoma 6
MGI:107189	Ahsg	alpha-2-HS-glycoprotein
MGI:107191	Bmpr1b	bone morphogenetic protein receptor, type 1B
MGI:107207	Coq7	demethyl-Q 7
MGI:107247	Adam7	a disintegrin and metallopeptidase domain 7
MGI:107339	Gfm1	G elongation factor 1
MGI:107341	Ctss	cathepsin S
MGI:107357	Inpp5d	inositol polyphosphate-5-phosphatase D
MGI:107362	Stxbp3a	syntaxin binding protein 3A
MGI:107364	Il17	interleukin 17
MGI:107373	Dnajc3	DnaJ (Hsp40) homolog, subfamily C, member 3
MGI:107375	Pctp	phosphatidylcholine transfer protein
MGI:107381	Epha1	Eph receptor A1
MGI:107399	Il17r	interleukin 17 receptor
MGI:107420	Irak1	interleukin-1 receptor-associated kinase 1
MGI:107422	Hspa4l	heat shock 70kDa protein 4 like
MGI:107430	Gdnf	glial cell line derived neurotrophic factor
MGI:107438	Cab39	calcium binding protein 39
MGI:107443	Fpr1	formyl peptide receptor 1
MGI:107444	Efna5	ephrin A5
MGI:107471	Notch4	Notch gene homolog 4 (Drosophila)
MGI:107472	Clgn	calmegin
MGI:107474	Cd38	CD38 antigen
MGI:107483	Rgl2	ral guanine nucleotide dissociation stimulator-like 2
MGI:107485	Ralgds	ral guanine nucleotide dissociation stimulator
MGI:107489	Phex	phosphate regulating gene with homologies to endopeptidases on the X chromosome (hypophosphatemia, vitamin D resistant rickets)
MGI:107511	Art1	ADP-ribosyltransferase 1
MGI:107527	Ly6a	lymphocyte antigen 6 complex, locus A
MGI:107537	Cln3	ceroid lipofuscinosis, neuronal 3, juvenile (Batten, Spielmeyer-Vogt disease)
MGI:107538	Klrb1c	killer cell lectin-like receptor subfamily B member 1C
MGI:107540	Klrb1a	killer cell lectin-like receptor subfamily B member 1A
MGI:107543	Sox17	SRY-box containing gene 17
MGI:107545	Art2b	ADP-ribosyltransferase 2b
MGI:107550	Sult2a2	sulfotransferase family 2A, dehydroepiandrosterone (DHEA)-preferring, member 2
MGI:107558	Sema3a	sema domain, immunoglobulin domain (Ig), short basic domain, secreted, (semaphorin) 3A
MGI:107560	Sema4a	sema domain, immunoglobulin domain (Ig), transmembrane domain (TM) and short cytoplasmic domain, (semaphorin) 4A
MGI:107567	Ifi1	interferon inducible protein 1
MGI:107572	Birc4	baculoviral IAP repeat-containing 4
MGI:107585	Srebf2	sterol regulatory element binding factor 2
MGI:107587	Isgf3g	interferon dependent positive acting transcription factor 3 gamma
MGI:107595	Sp4	trans-acting transcription factor 4
MGI:107606	Srebf1	sterol regulatory element binding factor 1
MGI:107613	Il11	interleukin 11
MGI:107654	Ifngr2	interferon gamma receptor 2
MGI:107655	Ifngr1	interferon gamma receptor 1
MGI:107656	Ifng	interferon gamma
MGI:107657	Ifnb1	interferon beta 1, fibroblast
MGI:107658	Ifnar1	interferon (alpha and beta) receptor 1
MGI:107673	Akr1b8	aldo-keto reductase family 1, member B8
MGI:107674	Cd1d1	CD1d1 antigen
MGI:107675	Cd1d2	CD1d2 antigen
MGI:107682	Ppp1r14b	protein phosphatase 1, regulatory (inhibitor) subunit 14B
MGI:107692	Fut7	fucosyltransferase 7
MGI:107700	Casp11	caspase 11, apoptosis-related cysteine peptidase
MGI:107704	Abcg1	ATP-binding cassette, sub-family G (WHITE), member 1
MGI:107716	Myo10	myosin X
MGI:107739	Casp3	caspase 3
MGI:107741	Pvr	poliovirus receptor
MGI:107745	Dctn1	dynactin 1
MGI:107757	Gfer	growth factor, erv1 (S. cerevisiae)-like (augmenter of liver regeneration)
MGI:107776	Gadd45b	growth arrest and DNA-damage-inducible 45 beta
MGI:107793	Crmp1	collapsin response mediator protein 1
MGI:107799	Gadd45a	growth arrest and DNA-damage-inducible 45 alpha
MGI:107816	Pfkfb1	6-phosphofructo-2-kinase/fructose-2,6-biphosphatase 1
MGI:107817	Serpina5	serine (or cysteine) peptidase inhibitor, clade A, member 5
MGI:107818	Mrc2	mannose receptor, C type 2
MGI:107822	Ebp	phenylalkylamine Ca2+ antagonist (emopamil) binding protein
MGI:107823	Ctsk	cathepsin K
MGI:107825	Adam8	a disintegrin and metallopeptidase domain 8
MGI:107846	Hrmt1l2	heterogeneous nuclear ribonucleoproteins methyltransferase-like 2 (S. cerevisiae)
MGI:107854	Es2el	expressed sequence 2 embryonic lethal
MGI:107877	Prkcsh	protein kinase C substrate 80K-H
MGI:107899	Cd36	CD36 antigen
MGI:107926	Rock2	Rho-associated coiled-coil forming kinase 2
MGI:107927	Rock1	Rho-associated coiled-coil forming kinase 1
MGI:107928	Aldh1a2	aldehyde dehydrogenase family 1, subfamily A2
MGI:107931	Sqstm1	sequestosome 1
MGI:107936	Il18	interleukin 18
MGI:107949	Rhob	ras homolog gene family, member B
MGI:107956	Slc8a1	solute carrier family 8 (sodium/calcium exchanger), member 1
MGI:107973	Igfals	insulin-like growth factor binding protein, acid labile subunit
MGI:108016	Rad21	RAD21 homolog (S. pombe)
MGI:108022	Pkn1	protein kinase N1
MGI:108027	Ptprv	protein tyrosine phosphatase, receptor type, V
MGI:108029	Scn10a	sodium channel, voltage-gated, type X, alpha
MGI:108030	Hyou1	hypoxia up-regulated 1
MGI:108037	Figf	c-fos induced growth factor
MGI:108046	Laptm5	lysosomal-associated protein transmembrane 5
MGI:108047	Bag1	Bcl2-associated athanogene 1
MGI:108051	Smad2	MAD homolog 2 (Drosophila)
MGI:108052	Bcl2l2	Bcl2-like 2
MGI:108054	Rit2	Ras-like without CAAX 2
MGI:108062	Siah2	seven in absentia 2
MGI:108064	Siah1a	seven in absentia 1A
MGI:108068	Cxcl1	chemokine (C-X-C motif) ligand 1
MGI:108069	Ccna2	cyclin A2
MGI:108075	Smo	smoothened homolog (Drosophila)
MGI:108080	Serpinf1	serine (or cysteine) peptidase inhibitor, clade F, member 1
MGI:108081	Sypl	synaptophysin-like protein
MGI:108082	Npy5r	neuropeptide Y receptor Y5
MGI:108084	Cep2	centrosomal protein 2
MGI:108086	Hdac1	histone deacetylase 1
MGI:108092	Bin1	bridging integrator 1
MGI:108101	Ddn	dendrin
MGI:108110	Sparcl1	SPARC-like 1 (mast9, hevin)
MGI:108111	Slc22a1	solute carrier family 22 (organic cation transporter), member 1
MGI:108177	Dhx9	DEAH (Asp-Glu-Ala-His) box polypeptide 9
MGI:108212	Ripk1	receptor (TNFRSF)-interacting serine-threonine kinase 1
MGI:108224	Ccl12	chemokine (C-C motif) ligand 12
MGI:108384	Btg2	B-cell translocation gene 2, anti-proliferative
MGI:108398	Tcfl4	transcription factor-like 4
MGI:108403	Rpo1-3	RNA polymerase 1-3
MGI:108410	Ptpn18	protein tyrosine phosphatase, non-receptor type 18
MGI:108412	Ppap2a	phosphatidic acid phosphatase 2a
MGI:108420	Nfe2l2	nuclear factor, erythroid derived 2, like 2
MGI:108424	Lrmp	lymphoid-restricted membrane protein
MGI:108429	Edg2	endothelial differentiation, lysophosphatidic acid G-protein-coupled receptor, 2
MGI:108443	Camp	cathelicidin antimicrobial peptide
MGI:108446	Rhod	ras homolog gene family, member D
MGI:108448	Angpt1	angiopoietin 1
MGI:108466	Ralbp1	ralA binding protein 1
MGI:108470	St6gal1	beta galactoside alpha 2,6 sialyltransferase 1
MGI:108495	Kcnj12	potassium inwardly-rectifying channel, subfamily J, member 12
MGI:108543	Tfpi2	tissue factor pathway inhibitor 2
MGI:108563	Ptpns1	protein tyrosine phosphatase, non-receptor type substrate 1
MGI:109128	Hnf4a	hepatic nuclear factor 4, alpha
MGI:109129	Taf6	TAF6 RNA polymerase II, TATA box binding protein (TBP)-associated factor
MGI:109130	Stip1	stress-induced phosphoprotein 1
MGI:109132	Snap91	synaptosomal-associated protein 91
MGI:109147	Oxtr	oxytocin receptor
MGI:109150	Mnt	max binding protein
MGI:109151	Ltbp1	latent transforming growth factor beta binding protein 1
MGI:109157	Elavl3	ELAV (embryonic lethal, abnormal vision, Drosophila)-like 3 (Hu antigen C)
MGI:109161	Gprk5	G protein-coupled receptor kinase 5
MGI:109169	Epas1	endothelial PAS domain protein 1
MGI:109175	Dab2	disabled homolog 2 (Drosophila)
MGI:109177	Cd59a	CD59a antigen
MGI:109186	Ncf4	neutrophil cytosolic factor 4
MGI:109191	Hfe	hemochromatosis
MGI:109196	Efnb3	ephrin B3
MGI:109198	Eif4ebp2	eukaryotic translation initiation factor 4E binding protein 2
MGI:109207	Eif4g2	eukaryotic translation initiation factor 4, gamma 2
MGI:109211	Pkn2	protein kinase N2
MGI:109244	Sema4d	sema domain, immunoglobulin domain (Ig), transmembrane domain (TM) and short cytoplasmic domain, (semaphorin) 4D
MGI:109247	Ddit3	DNA-damage inducible transcript 3
MGI:109249	Adamts1	a disintegrin-like and metallopeptidse (reprolysin type) with thrombospondin type 1 motif, 1
MGI:109255	Gzmd	granzyme D
MGI:109256	Gzmc	granzyme C
MGI:109266	Gzma	granzyme A
MGI:109267	Gzmb	granzyme B
MGI:109269	Inhbe	inhibin beta E
MGI:109278	Ogn	osteoglycin
MGI:109282	Apeg1	aortic preferentially expressed gene 1
MGI:109283	Pdcd6	programmed cell death 6
MGI:109284	Psen2	presenilin 2
MGI:109292	Rad50	RAD50 homolog (S. cerevisiae)
MGI:109294	Cd244	CD244 natural killer cell receptor 2B4
MGI:109297	Slpi	secretory leukocyte peptidase inhibitor
MGI:109298	Mapkapk2	MAP kinase-activated protein kinase 2
MGI:109299	Polr2c	polymerase (RNA) II (DNA directed) polypeptide C
MGI:109301	Papola	poly (A) polymerase alpha
MGI:109320	Mmp15	matrix metallopeptidase 15
MGI:109324	Fadd	Fas (TNFRSF6)-associated via death domain
MGI:109325	F7	coagulation factor VII
MGI:109326	Bnip3	BCL2/adenovirus E1B 19kDa-interacting protein 1, NIP3
MGI:109335	Spam1	sperm adhesion molecule 1
MGI:109337	Brca2	breast cancer 2
MGI:109338	Rap1ga1	Rap1, GTPase-activating protein 1
MGI:109340	Pitx2	paired-like homeodomain transcription factor 2
MGI:109344	Eya1	eyes absent 1 homolog (Drosophila)
MGI:109347	Lum	lumican
MGI:109349	Atf2	activating transcription factor 2
MGI:109350	Slc4a3	solute carrier family 4 (anion exchanger), member 3
MGI:109351	Slc4a2	solute carrier family 4 (anion exchanger), member 2
MGI:109356	Snap23	synaptosomal-associated protein 23
MGI:109360	Lmo4	LIM domain only 4
MGI:109365	Napsa	napsin A aspartic peptidase
MGI:109368	Gimap1	GTPase, IMAP family member 1
MGI:109373	Hmox2	heme oxygenase (decycling) 2
MGI:109380	Il10rb	interleukin 10 receptor, beta
MGI:109382	Ccrn4l	CCR4 carbon catabolite repression 4-like (S. cerevisiae)
MGI:109383	Casp7	caspase 7
MGI:109384	Atf3	activating transcription factor 3
MGI:109386	Cebpz	CCAAT/enhancer binding protein zeta
MGI:109392	Esr2	estrogen receptor 2 (beta)
MGI:109393	Slc4a1	solute carrier family 4 (anion exchanger), member 1
MGI:109424	Abca4	ATP-binding cassette, sub-family A (ABC1), member 4
MGI:109443	Gtpbp1	GTP binding protein 1
MGI:109452	Smad1	MAD homolog 1 (Drosophila)
MGI:109474	Commd1	COMM domain containing 1
MGI:109486	Prdx2	peroxiredoxin 2
MGI:109496	Lgals9	lectin, galactose binding, soluble 9
MGI:109515	Sftpd	surfactant associated protein D
MGI:109516	Sftpb	surfactant associated protein B
MGI:109517	Sftpc	surfactant associated protein C
MGI:109529	Dpf2	D4, zinc and double PHD fingers family 2
MGI:109531	Cdc37	cell division cycle 37 homolog (S. cerevisiae)
MGI:1095407	Bmpr2	bone morphogenic protein receptor, type II (serine/threonine kinase)
MGI:1095416	Jag1	jagged 1
MGI:1095438	Slc2a2	solute carrier family 2 (facilitated glucose transporter), member 2
MGI:109545	Admr	adrenomedullin receptor
MGI:109548	Adam10	a disintegrin and metallopeptidase domain 10
MGI:109553	Ctsc	cathepsin C
MGI:109562	Cmkor1	chemokine orphan receptor 1
MGI:109563	Cxcr4	chemokine (C-X-C motif) receptor 4
MGI:109573	Tep1	telomerase associated protein 1
MGI:109575	Tecta	tectorin alpha
MGI:109579	Serpinb5	serine (or cysteine) peptidase inhibitor, clade B, member 5
MGI:109580	Sf3b4	splicing factor 3b, subunit 4
MGI:109582	Polr2j	polymerase (RNA) II (DNA directed) polypeptide J
MGI:109583	Pten	phosphatase and tensin homolog
MGI:109585	Pld1	phospholipase D1
MGI:109601	Nck1	non-catalytic region of tyrosine kinase adaptor protein 1
MGI:109603	Cmklr1	chemokine-like receptor 1
MGI:109604	Plk3	polo-like kinase 3 (Drosophila)
MGI:109611	Dsp	desmoplakin
MGI:109626	Taz	tafazzin
MGI:109629	Atp6ap1	ATPase, H+ transporting, lysosomal accessory protein 1
MGI:1096324	Lst1	leukocyte specific transcript 1
MGI:1096335	Adam17	a disintegrin and metallopeptidase domain 17
MGI:1096337	Ephb1	Eph receptor B1
MGI:1096338	Ephb6	Eph receptor B6
MGI:1096342	Rhoa	ras homolog gene family, member A
MGI:1096360	Cd151	CD151 antigen
MGI:1096363	Gp5	glycoprotein 5 (platelet)
MGI:1096380	Psmb10	proteasome (prosome, macropain) subunit, beta type 10
MGI:1096381	Arntl	aryl hydrocarbon receptor nuclear translocator-like
MGI:1096393	Snai2	snail homolog 2 (Drosophila)
MGI:1096398	Cd81	CD 81 antigen
MGI:1096399	Sybl1	synaptobrevin like 1
MGI:1096566	Miz1	Msx-interacting-zinc finger
MGI:1096863	Entpd2	ectonucleoside triphosphate diphosphohydrolase 2
MGI:1096867	Etv5	ets variant gene 5
MGI:1096868	Cxcl5	chemokine (C-X-C motif) ligand 5
MGI:1096873	Irf4	interferon regulatory factor 4
MGI:1096878	Defb1	defensin beta 1
MGI:1096880	Phlda1	pleckstrin homology-like domain, family A, member 1
MGI:1097152	Ptpro	protein tyrosine phosphatase, receptor type, O
MGI:1097153	Cx3cl1	chemokine (C-X3-C motif) ligand 1
MGI:1097156	Ptgis	prostaglandin I2 (prostacyclin) synthase
MGI:1097160	P2rx3	purinergic receptor P2X, ligand-gated ion channel, 3
MGI:1097161	Bak1	BCL2-antagonist/killer 1
MGI:1097163	Pold2	polymerase (DNA directed), delta 2, regulatory subunit
MGI:1097680	C3ar1	complement component 3a receptor 1
MGI:1097691	Hdac2	histone deacetylase 2
MGI:1097712	Npc1	Niemann Pick type C1
MGI:1098211	Pik3cd	phosphatidylinositol 3-kinase catalytic delta polypeptide
MGI:1098235	P2rx1	purinergic receptor P2X, ligand-gated ion channel, 1
MGI:1098243	Ifnar2	interferon (alpha and beta) receptor 2
MGI:1098259	Capg	capping protein (actin filament), gelsolin-like
MGI:1098260	Kif1c	kinesin family member 1C
MGI:1098268	Kif5b	kinesin family member 5B
MGI:1098271	Rgs2	regulator of G-protein signaling 2
MGI:1098272	Rnasel	ribonuclease L (2', 5'-oligoisoadenylate synthetase-dependent)
MGI:1098274	Cyp27b1	cytochrome P450, family 27, subfamily b, polypeptide 1
MGI:1098296	Cpt1a	carnitine palmitoyltransferase 1a, liver
MGI:1098297	Cpt1b	carnitine palmitoyltransferase 1b, muscle
MGI:1098547	Nola2	nucleolar protein family A, member 2
MGI:1098658	Stag1	stromal antigen 1
MGI:1098667	Adam11	a disintegrin and metallopeptidase domain 11
MGI:1098726	Emp2	epithelial membrane protein 2
MGI:1098729	Emp3	epithelial membrane protein 3
MGI:1098824	Odf2	outer dense fiber of sperm tails 2
MGI:1099438	Nsdhl	NAD(P) dependent steroid dehydrogenase-like
MGI:1099448	Ccl25	chemokine (C-C motif) ligand 25
MGI:1099790	Plk2	polo-like kinase 2 (Drosophila)
MGI:1099792	Ptpn4	protein tyrosine phosphatase, non-receptor type 4
MGI:1099800	Nfkb2	nuclear factor of kappa light polypeptide gene enhancer in B-cells 2, p49/p100
MGI:1099809	Fgf10	fibroblast growth factor 10
MGI:1100492	Nrp2	neuropilin 2
MGI:1100494	Ercc6	excision repair cross-complementing rodent repair deficiency, complementation group 6
MGI:1100498	Pitx3	paired-like homeodomain transcription factor 3
MGI:1100515	Dr1	down-regulator of transcription 1
MGI:1100518	Smad7	MAD homolog 7 (Drosophila)
MGI:1100521	Slc7a3	solute carrier family 7 (cationic amino acid transporter, y+ system), member 3
MGI:1100842	Gfra1	glial cell line derived neurotrophic factor family receptor alpha 1
MGI:1100846	Pparbp	peroxisome proliferator activated receptor binding protein
MGI:1100851	Elavl1	ELAV (embryonic lethal, abnormal vision, Drosophila)-like 1 (Hu antigen R)
MGI:1100861	Targ2	transforming growth factor alpha regulated gene 2
MGI:1100864	Dnahc11	dynein, axonemal, heavy chain 11
MGI:1100883	Celsr1	cadherin EGF LAG seven-pass G-type receptor 1
MGI:1100886	Prom1	prominin 1
MGI:1101353	Klf10	Kruppel-like factor 10
MGI:1101355	Ltbp3	latent transforming growth factor beta binding protein 3
MGI:1101778	Bmx	BMX non-receptor tyrosine kinase
MGI:1194495	Fprl1	formyl peptide receptor-like 1
MGI:1194503	Atp2a3	ATPase, Ca++ transporting, ubiquitous
MGI:1194505	C1qbp	complement component 1, q subcomponent binding protein
MGI:1194883	Crx	cone-rod homeobox containing gene
MGI:1194898	Ppl	periplakin
MGI:1195256	Pla2g4a	phospholipase A2, group IVA (cytosolic, calcium-dependent)
MGI:1195269	Slc22a12	solute carrier family 22 (organic anion/cation transporter), member 12
MGI:1195272	Eda	ectodysplasin-A
MGI:1195463	Mr1	major histocompatibility complex, class I-related
MGI:1195971	Pira1	paired-Ig-like receptor A1
MGI:1196275	Klrd1	killer cell lectin-like receptor, subfamily D, member 1
MGI:1196294	Fubp1	far upstream element (FUSE) binding protein 1
MGI:1196295	Ptpn20	protein tyrosine phosphatase, non-receptor type 20
MGI:1196403	Pla2g4c	phospholipase A2, group IVC (cytosolic, calcium-independent)
MGI:1196423	Onecut1	one cut domain, family member 1
MGI:1196458	Scarb2	scavenger receptor class B, member 2
MGI:1196464	Emr4	EGF-like module containing, mucin-like, hormone receptor-like sequence 4
MGI:1196908	Tcea3	transcription elongation factor A (SII), 3
MGI:1197006	Pipox	pipecolic acid oxidase
MGI:1197007	Birc3	baculoviral IAP repeat-containing 3
MGI:1197009	Birc2	baculoviral IAP repeat-containing 2
MGI:1197010	Sumo1	SMT3 suppressor of mif two 3 homolog 1 (yeast)
MGI:1197519	Bcl2l11	BCL2-like 11 (apoptosis facilitator)
MGI:1197523	Prss7	protease, serine, 7 (enterokinase)
MGI:1197526	Irx2	Iroquois related homeobox 2 (Drosophila)
MGI:1201402	Ccr8	chemokine (C-C motif) receptor 8
MGI:1201409	Pknox1	Pbx/knotted 1 homeobox
MGI:1201412	Rdh5	retinol dehydrogenase 5
MGI:1201670	Psmd4	proteasome (prosome, macropain) 26S subunit, non-ATPase, 4
MGI:1201674	Smad3	MAD homolog 3 (Drosophila)
MGI:1201689	Tapbp	TAP binding protein
MGI:1201780	Atp6v1a	ATPase, H+ transporting, V1 subunit A1
MGI:1201787	Socs2	suppressor of cytokine signaling 2
MGI:1201791	Socs3	suppressor of cytokine signaling 3
MGI:1202295	Entpd6	ectonucleoside triphosphate diphosphohydrolase 6
MGI:1202307	Phlda2	pleckstrin homology-like domain, family A, member 2
MGI:1202709	Tert	telomerase reverse transcriptase
MGI:1202710	Art4	ADP-ribosyltransferase 4
MGI:1202715	Tcf21	transcription factor 21
MGI:1202717	Psen1	presenilin 1
MGI:1202722	Gtf2i	general transcription factor II I
MGI:1202864	Myoc	myocilin
MGI:1202882	Rhced	Rhesus blood group CE and D
MGI:1202889	Sema6b	sema domain, transmembrane domain (TM), and cytoplasmic domain, (semaphorin) 6B
MGI:1202890	Angpt2	angiopoietin 2
MGI:1202907	Csrp2	cysteine and glycine-rich protein 2
MGI:1203290	Mcp	membrane cofactor protein
MGI:1203517	Birc5	baculoviral IAP repeat-containing 5
MGI:1203522	Magi1	membrane associated guanylate kinase, WW and PDZ domain containing 1
MGI:1206591	Biklk	Bcl2-interacting killer-like
MGI:1261423	Casp8	caspase 8
MGI:1261831	Hap1	huntingtin-associated protein 1
MGI:1270156	Sept4	septin 4
MGI:1270849	Rps6kb1	ribosomal protein S6 kinase, polypeptide 1
MGI:1270854	Gck	glucokinase
MGI:1276107	Mmp16	matrix metallopeptidase 16
MGI:1276108	Birc6	baculoviral IAP repeat-containing 6
MGI:1276116	Ep300	E1A binding protein p300
MGI:1276523	Ncoa1	nuclear receptor coactivator 1
MGI:1276533	Ncoa2	nuclear receptor coactivator 2
MGI:1276535	Ncoa3	nuclear receptor coactivator 3
MGI:1276578	Gfi1b	growth factor independent 1B
MGI:1277114	Ptgfrn	prostaglandin F2 receptor negative regulator
MGI:1277151	Snca	synuclein, alpha
MGI:1277162	Cdk6	cyclin-dependent kinase 6
MGI:1277171	Dcx	doublecortin
MGI:1277207	Cxcr3	chemokine (C-X-C motif) receptor 3
MGI:1277215	Bbs1	Bardet-Biedl syndrome 1 homolog (human)
MGI:1277216	Gtf2h1	general transcription factor II H, polypeptide 1
MGI:1277950	Casp9	caspase 9
MGI:1277957	Kcnn4	potassium intermediate/small conductance calcium-activated channel, subfamily N, member 4
MGI:1277959	Dlgh4	discs, large homolog 4 (Drosophila)
MGI:1277964	Ehhadh	enoyl-Coenzyme A, hydratase/3-hydroxyacyl Coenzyme A dehydrogenase
MGI:1277978	Sap18	Sin3-associated polypeptide 18
MGI:1277980	Fgf18	fibroblast growth factor 18
MGI:1277991	Dach1	dachshund 1 (Drosophila)
MGI:1278315	Lrp5	low density lipoprotein receptor-related protein 5
MGI:1278330	Smpd2	sphingomyelin phosphodiesterase 2, neutral
MGI:1278342	Lect2	leukocyte cell-derived chemotaxin 2
MGI:1289288	Gpr172b	G protein-coupled receptor 172B
MGI:1298204	Ppt1	palmitoyl-protein thioesterase 1
MGI:1298205	Slc7a5	solute carrier family 7 (cationic amino acid transporter, y+ system), member 5
MGI:1298210	Hcn2	hyperpolarization-activated, cyclic nucleotide-gated K+ 2
MGI:1298219	Clec11a	C-type lectin domain family 11, member a
MGI:1298220	Birc1e	baculoviral IAP repeat-containing 1e
MGI:1298223	Birc1a	baculoviral IAP repeat-containing 1a
MGI:1298226	Birc1b	baculoviral IAP repeat-containing 1b
MGI:1298228	Foxq1	forkhead box Q1
MGI:1298230	Cnot7	CCR4-NOT transcription complex, subunit 7
MGI:1298387	Fhl1	four and a half LIM domains 1
MGI:1298389	Clec4d	C-type lectin domain family 4, member d
MGI:1306778	Mtap1b	microtubule-associated protein 1 B
MGI:1306784	Cited2	Cbp/p300-interacting transactivator, with Glu/Asp-rich carboxy-terminal domain, 2
MGI:1306796	Apaf1	apoptotic peptidase activating factor 1
MGI:1306797	Aoc3	amine oxidase, copper containing 3
MGI:1306800	Pcdh8	protocadherin 8
MGI:1306805	Tff2	trefoil factor 2 (spasmolytic protein 1)
MGI:1306826	Sema7a	sema domain, immunoglobulin domain (Ig), and GPI membrane anchor, (semaphorin) 7A
MGI:1309463	Stch	stress 70 protein chaperone, microsome-associated, human homolog
MGI:1309464	Mapk8ip1	mitogen activated protein kinase 8 interacting protein 1
MGI:1309472	Ltb4r1	leukotriene B4 receptor 1
MGI:1309478	Baz1a	bromodomain adjacent to zinc finger domain 1A
MGI:1309517	Itm2b	integral membrane protein 2B
MGI:1309993	Krt1-1	keratin complex 1, acidic, gene 1
MGI:1309999	Prkx	protein kinase, X-linked
MGI:1313266	Alcam	activated leukocyte cell adhesion molecule
MGI:1313268	Chrd	chordin
MGI:1314881	Chaf1b	chromatin assembly factor 1, subunit B (p60)
MGI:1315197	Hk2	hexokinase 2
MGI:1315204	Slc40a1	solute carrier family 40 (iron-regulated transporter), member 1
MGI:1316649	Sphk1	sphingosine kinase 1
MGI:1316650	Slc37a4	solute carrier family 37 (glycerol-6-phosphate transporter), member 4
MGI:1316658	Cyba	cytochrome b-245, alpha polypeptide
MGI:1316687	Nap1l4	nucleosome assembly protein 1-like 4
MGI:1316714	Cox7a1	cytochrome c oxidase, subunit VIIa 1
MGI:1316726	Fga	fibrinogen, alpha polypeptide
MGI:1321161	Ppp2cb	protein phosphatase 2a, catalytic subunit, beta isoform
MGI:1321385	Entpd5	ectonucleoside triphosphate diphosphohydrolase 5
MGI:1321386	Entpd3	ectonucleoside triphosphate diphosphohydrolase 3
MGI:1321390	Enpp2	ectonucleotide pyrophosphatase/phosphodiesterase 2
MGI:1321392	Pex7	peroxisome biogenesis factor 7
MGI:1321394	Gdf2	growth differentiation factor 2
MGI:1321396	Pstpip1	proline-serine-threonine phosphatase-interacting protein 1
MGI:1321398	F11r	F11 receptor
MGI:1321402	Lcp2	lymphocyte cytosolic protein 2
MGI:1321404	Ly86	lymphocyte antigen 86
MGI:1328323	Syngr1	synaptogyrin 1
MGI:1328351	Nts	neurotensin
MGI:1328352	Sh2d1a	SH2 domain protein 1A
MGI:1328363	Ccnt1	cyclin T1
MGI:1328368	Cdk9	cyclin-dependent kinase 9 (CDC2-related kinase)
MGI:1328787	Smad5	MAD homolog 5 (Drosophila)
MGI:1329024	Mds1	myelodysplasia syndrome 1 homolog (human)
MGI:1329025	Edil3	EGF-like repeats and discoidin I-like domains 3
MGI:1329031	Ccl20	chemokine (C-C motif) ligand 20
MGI:1329038	Mllt10	myeloid/lymphoid or mixed lineage-leukemia translocation to 10 homolog (Drosophila)
MGI:1329039	Ccl17	chemokine (C-C motif) ligand 17
MGI:1329042	Sgce	sarcoglycan, epsilon
MGI:1330275	Gpr44	G protein-coupled receptor 44
MGI:1330282	S100a4	S100 calcium binding protein A4
MGI:1330299	Dyrk1a	dual-specificity tyrosine-(Y)-phosphorylation regulated kinase 1a
MGI:1330806	Arg2	arginase type II
MGI:1330819	Osmr	oncostatin M receptor
MGI:1330826	Atp9a	ATPase, class II, type 9A
MGI:1330828	Cdk5r2	cyclin-dependent kinase 5, regulatory subunit 2 (p39)
MGI:1330838	Lgmn	legumain
MGI:1330860	Chi3l3	chitinase 3-like 3
MGI:1332226	Soat2	sterol O-acyltransferase 2
MGI:1332240	Heph	hephaestin
MGI:1332623	Dok2	docking protein 2
MGI:1333114	Pigq	phosphatidylinositol glycan, class Q
MGI:1333743	Mpeg1	macrophage expressed gene 1
MGI:1333744	Gp1ba	glycoprotein 1b, alpha polypeptide
MGI:1333745	Snapap	SNAP-associated protein
MGI:1333752	Hdac6	histone deacetylase 6
MGI:1333753	Pdcd6ip	programmed cell death 6 interacting protein
MGI:1333760	Tcfec	transcription factor EC
MGI:1333777	Aqp3	aquaporin 3
MGI:1333783	Ccs	copper chaperone for superoxide dismutase
MGI:1333784	Hdac5	histone deacetylase 5
MGI:1333787	Inppl1	inositol polyphosphate phosphatase-like 1
MGI:1333795	Srp72	signal recognition particle 72
MGI:1333797	Ccr6	chemokine (C-C motif) receptor 6
MGI:1333798	Avil	advillin
MGI:1333800	Il18bp	interleukin 18 binding protein
MGI:1333809	Edg6	endothelial differentiation, G-protein-coupled receptor 6
MGI:1333833	Cbfa2t2h	core-binding factor, runt domain, alpha subunit 2, translocated to, 2 homolog (human)
MGI:1333842	Grap2	GRB2-related adaptor protein 2
MGI:1333854	Gab2	growth factor receptor bound protein 2-associated protein 2
MGI:1333879	Ap3b1	adaptor-related protein complex 3, beta 1 subunit
MGI:1333882	Adam15	a disintegrin and metallopeptidase domain 15 (metargidin)
MGI:1333884	Msc	musculin
MGI:1334209	Gja9	gap junction membrane channel protein alpha 9
MGI:1334257	Pscd1	pleckstrin homology, Sec7 and coiled-coil domains 1
MGI:1334263	Neurl	neuralized-like homolog (Drosophila)
MGI:1334419	Cd5l	CD5 antigen-like
MGI:1335072	Slc22a2	solute carrier family 22 (organic cation transporter), member 2
MGI:1335107	Pscd3	pleckstrin homology, Sec7 and coiled-coil domains 3
MGI:1336155	Lss	lanosterol synthase
MGI:1336199	Ppp1r13b	protein phosphatase 1, regulatory (inhibitor) subunit 13B
MGI:1336212	Ncr1	natural cytotoxicity triggering receptor 1
MGI:1336880	Eftud2	elongation factor Tu GTP binding domain containing 2
MGI:1336885	Cd84	CD84 antigen
MGI:1336895	Rce1	RCE1 homolog, prenyl protein peptidase (S. cerevisiae)
MGI:1337008	Ankfy1	ankyrin repeat and FYVE domain containing 1
MGI:1337026	Sdcbp	syndecan binding protein
MGI:1337040	Nr1i2	nuclear receptor subfamily 1, group I, member 2
MGI:1337080	Ncor2	nuclear receptor co-repressor 2
MGI:1337120	Slc7a7	solute carrier family 7 (cationic amino acid transporter, y+ system), member 7
MGI:1338013	Cbfa2t3h	core-binding factor, runt domain, alpha subunit 2, translocated to, 3 homolog (human)
MGI:1338022	Opn3	opsin (encephalopsin)
MGI:1338024	Mapk11	mitogen-activated protein kinase 11
MGI:1338036	Plunc	palate, lung, and nasal epithelium carcinoma associated
MGI:1338044	Cyp8b1	cytochrome P450, family 8, subfamily b, polypeptide 1
MGI:1338056	Klf5	Kruppel-like factor 5
MGI:1338068	Pdpk1	3-phosphoinositide dependent protein kinase-1
MGI:1338069	Itsn1	intersectin 1 (SH3 domain protein 1A)
MGI:1338071	Ikbkb	inhibitor of kappaB kinase beta
MGI:1338074	Ikbkg	inhibitor of kappaB kinase gamma
MGI:1338762	Fhl2	four and a half LIM domains 2
MGI:1338798	S100a11	S100 calcium binding protein A11 (calizzarin)
MGI:1338801	Cyfip1	cytoplasmic FMR1 interacting protein 1
MGI:1338823	Maz	MYC-associated zinc finger protein (purine-binding transcription factor)
MGI:1338849	S100a3	S100 calcium binding protein A3
MGI:1338859	P2rx4	purinergic receptor P2X, ligand-gated ion channel 4
MGI:1338871	Btrc	beta-transducin repeat containing protein
MGI:1338898	Padi4	peptidyl arginine deiminase, type IV
MGI:1338915	S100a5	S100 calcium binding protein A5
MGI:1338917	S100a1	S100 calcium binding protein A1
MGI:1338938	Bmpr1a	bone morphogenetic protein receptor, type 1A
MGI:1338944	Acvr1b	activin A receptor, type 1B
MGI:1338946	Acvrl1	activin A receptor, type II-like 1
MGI:1338947	S100a9	S100 calcium binding protein A9 (calgranulin B)
MGI:1339365	Edg3	endothelial differentiation, sphingolipid G-protein-coupled receptor, 3
MGI:1339467	S100a6	S100 calcium binding protein A6 (calcyclin)
MGI:1339468	S100a10	S100 calcium binding protein A10 (calpactin)
MGI:1339708	Neurod1	neurogenic differentiation 1
MGI:1339711	Myh1	myosin, heavy polypeptide 1, skeletal muscle, adult
MGI:1339751	Csf3	colony stimulating factor 3 (granulocyte)
MGI:1339752	Csf2	colony stimulating factor 2 (granulocyte-macrophage)
MGI:1339753	Csf1	colony stimulating factor 1 (macrophage)
MGI:1339754	Csf2ra	colony stimulating factor 2 receptor, alpha, low-affinity (granulocyte-macrophage)
MGI:1339755	Csf3r	colony stimulating factor 3 receptor (granulocyte)
MGI:1339758	Csf1r	colony stimulating factor 1 receptor
MGI:1339759	Csf2rb1	colony stimulating factor 2 receptor, beta 1, low-affinity (granulocyte-macrophage)
MGI:1339760	Csf2rb2	colony stimulating factor 2 receptor, beta 2, low-affinity (granulocyte-macrophage)
MGI:1339946	Tbpl1	TATA box binding protein-like 1
MGI:1339949	Adamts4	a disintegrin-like and metallopeptidase (reprolysin type) with thrombospondin type 1 motif, 4
MGI:1339951	Cse1l	chromosome segregation 1-like (S. cerevisiae)
MGI:1339957	P2rx7	purinergic receptor P2X, ligand-gated ion channel, 7
MGI:1339984	Pak2	p21 (CDKN1A)-activated kinase 2
MGI:1340026	Mmp13	matrix metallopeptidase 13
MGI:1340044	Lrp8	low density lipoprotein receptor-related protein 8, apolipoprotein e receptor
MGI:1340053	Cst9	cystatin 9
MGI:1340062	Sgk	serum/glucocorticoid regulated kinase
MGI:1340094	Cxcl2	chemokine (C-X-C motif) ligand 2
MGI:1340806	Parp1	poly (ADP-ribose) polymerase family, member 1
MGI:1340894	Adam2	a disintegrin and metallopeptidase domain 2
MGI:1340899	Chi3l1	chitinase 3-like 1
MGI:1341098	Chi3l4	chitinase 3-like 4
MGI:1341105	Rp1h	retinitis pigmentosa 1 homolog (human)
MGI:1341168	Spic	Spi-C transcription factor (Spi-1/PU.1 related)
MGI:1341171	Lect1	leukocyte cell derived chemotaxin 1
MGI:1341793	Pbx2	pre B-cell leukemia transcription factor 2
MGI:1341799	Ndrg1	N-myc downstream regulated gene 1
MGI:1341839	Card4	caspase recruitment domain 4
MGI:1341848	Spink4	serine peptidase inhibitor, Kazal type 4
MGI:1341850	Rb1cc1	RB1-inducible coiled-coil 1
MGI:1341857	Mad1l1	mitotic arrest deficient 1-like 1
MGI:1341867	Mmp24	matrix metallopeptidase 24
MGI:1341898	Nmur1	neuromedin U receptor 1
MGI:1341902	Ccr9	chemokine (C-C motif) receptor 9
MGI:1341909	Ly96	lymphocyte antigen 96
MGI:1342005	Mthfd1	methylenetetrahydrofolate dehydrogenase (NADP+ dependent), methenyltetrahydrofolate cyclohydrolase, formyltetrahydrofolate synthase
MGI:1342057	Galgt1	UDP-N-acetyl-alpha-D-galactosamine:(N-acetylneuraminyl)-galactosylglucosylceramide-beta-1, 4-N-acetylgalactosaminyltransferase
MGI:1342248	Slc25a17	solute carrier family 25 (mitochondrial carrier, peroxisomal membrane protein), member 17
MGI:1342286	Fliih	flightless I homolog (Drosophila)
MGI:1342287	Klf4	Kruppel-like factor 4 (gut)
MGI:1342290	Rps6ka2	ribosomal protein S6 kinase, polypeptide 2
MGI:1342294	C80913	expressed sequence C80913
MGI:1342299	Ruvbl2	RuvB-like protein 2
MGI:1342335	Ddef1	development and differentiation enhancing
MGI:1342772	Klf2	Kruppel-like factor 2 (lung)
MGI:1343098	Aif1	allograft inflammatory factor 1
MGI:1343124	Hpse	heparanase
MGI:1343498	Edar	ectodysplasin-A receptor
MGI:1344334	Gtlf3a	gene trap locus F3a
MGI:1344337	Grem1	gremlin 1
MGI:1344347	Synj2bp	synaptojanin 2 binding protein
MGI:1344391	Sh3bp5	SH3-domain binding protein 5 (BTK-associated)
MGI:1344402	AI256711	expressed sequence AI256711
MGI:1344412	Ldb3	LIM domain binding 3
MGI:1344415	Dmtf1	cyclin D binding myb-like transcription factor 1
MGI:1344417	Neu2	neuraminidase 2
MGI:1345092	Pglyrp1	peptidoglycan recognition protein 1
MGI:1345138	Spry2	sprouty homolog 2 (Drosophila)
MGI:1345151	Clec5a	C-type lectin domain family 5, member a
MGI:1345156	Gcl	germ cell-less homolog (Drosophila)
MGI:1345193	Nalp5	NACHT, leucine rich repeat and PYD containing 5
MGI:1345275	Slc11a1	solute carrier family 11 (proton-coupled divalent metal ion transporters), member 1
MGI:1345277	Ddr2	discoidin domain receptor family, member 2
MGI:1345278	Slc29a2	solute carrier family 29 (nucleoside transporters), member 2
MGI:1345279	Slc11a2	solute carrier family 11 (proton-coupled divalent metal ion transporters), member 2
MGI:1345283	Slc25a1	solute carrier family 25 (mitochondrial carrier, citrate transporter), member 1
MGI:1345284	Slc34a1	solute carrier family 34 (sodium phosphate), member 1
MGI:1345297	Slc35a2	solute carrier family 35 (UDP-galactose transporter), member 2
MGI:1345633	Mars	methionine-tRNA synthetase
MGI:1345961	Coro1a	coronin, actin binding protein 1A
MGI:1346021	Slco2a1	solute carrier organic anion transporter family, member 2a1
MGI:1346029	Slc26a4	solute carrier family 26, member 4
MGI:1346047	Gdf15	growth differentiation factor 15
MGI:1346053	Kel	Kell blood group
MGI:1346076	Mmp17	matrix metallopeptidase 17
MGI:1346086	Agtrl1	angiotensin receptor-like 1
MGI:1346087	Srp54	signal recognition particle 54
MGI:1346088	Cd52	CD52 antigen
MGI:1346316	Ccl19	chemokine (C-C motif) ligand 19
MGI:1346320	Taf10	TAF10 RNA polymerase II, TATA box binding protein (TBP)-associated factor
MGI:1346321	Adamts5	a disintegrin-like and metallopeptidase (reprolysin type) with thrombospondin type 1 motif, 5 (aggrecanase-2)
MGI:1346327	Fyb	FYN binding protein
MGI:1346331	Def8	differentially expressed in FDCP 8
MGI:1346342	Clca3	chloride channel calcium activated 3
MGI:1346345	Map2k5	mitogen activated protein kinase kinase 5
MGI:1346348	Taf7	TAF7 RNA polymerase II, TATA box binding protein (TBP)-associated factor
MGI:1346349	Sh3bp2	SH3-domain binding protein 2
MGI:1346523	Sgcb	sarcoglycan, beta (dystrophin-associated glycoprotein)
MGI:1346524	Sgcg	sarcoglycan, gamma (dystrophin-associated glycoprotein)
MGI:1346526	Psmb9	proteosome (prosome, macropain) subunit, beta type 9 (large multifunctional peptidase 2)
MGI:1346527	Psmb8	proteosome (prosome, macropain) subunit, beta type 8 (large multifunctional peptidase 7)
MGI:1346833	Nr5a1	nuclear receptor subfamily 5, group A, member 1
MGI:1346834	Nr5a2	nuclear receptor subfamily 5, group A, member 2
MGI:1346858	Mapk1	mitogen activated protein kinase 1
MGI:1346859	Mapk3	mitogen activated protein kinase 3
MGI:1346861	Mapk8	mitogen activated protein kinase 8
MGI:1346862	Mapk9	mitogen activated protein kinase 9
MGI:1346864	Mapk13	mitogen activated protein kinase 13
MGI:1346865	Mapk14	mitogen activated protein kinase 14
MGI:1346866	Map2k1	mitogen activated protein kinase kinase 1
MGI:1346867	Map2k2	mitogen activated protein kinase kinase 2
MGI:1346868	Map2k3	mitogen activated protein kinase kinase 3
MGI:1346869	Map2k4	mitogen activated protein kinase kinase 4
MGI:1346870	Map2k6	mitogen activated protein kinase kinase 6
MGI:1346871	Map2k7	mitogen activated protein kinase kinase 7
MGI:1346872	Map3k1	mitogen activated protein kinase kinase kinase 1
MGI:1346874	Map3k3	mitogen activated protein kinase kinase kinase 3
MGI:1346875	Map3k4	mitogen activated protein kinase kinase kinase 4
MGI:1346876	Map3k5	mitogen activated protein kinase kinase kinase 5
MGI:1346878	Map3k8	mitogen activated protein kinase kinase kinase 8
MGI:1346880	Map3k11	mitogen activated protein kinase kinase kinase 11
MGI:1346882	Map4k1	mitogen activated protein kinase kinase kinase kinase 1
MGI:1346999	Prnd	prion protein dublet
MGI:1347002	Angptl2	angiopoietin-like 2
MGI:1347005	Psma1	proteasome (prosome, macropain) subunit, alpha type 1
MGI:1347014	Psmb3	proteasome (prosome, macropain) subunit, beta type 3
MGI:1347045	Psmb2	proteasome (prosome, macropain) subunit, beta type 2
MGI:1347048	Clcn7	chloride channel 7
MGI:1347053	Git2	G protein-coupled receptor kinase-interactor 2
MGI:1347060	Psma4	proteasome (prosome, macropain) subunit, alpha type 4
MGI:1347061	Abcg2	ATP-binding cassette, sub-family G (WHITE), member 2
MGI:1347078	Gprk6	G protein-coupled receptor kinase 6
MGI:1347080	Ifi202a	interferon activated gene 202A
MGI:1347081	Poli	polymerase (DNA directed), iota
MGI:1347095	Cd97	CD97 antigen
MGI:1347244	Axl	AXL receptor tyrosine kinase
MGI:1347245	Ceacam1	CEA-related cell adhesion molecule 1
MGI:1347246	Ceacam2	CEA-related cell adhesion molecule 2
MGI:1347250	Psg17	pregnancy specific glycoprotein 17
MGI:1347251	Psg18	pregnancy specific glycoprotein 18
MGI:1347344	Gla	galactosidase, alpha
MGI:1347354	Homer2	homer homolog 2 (Drosophila)
MGI:1347355	Slc7a11	solute carrier family 7 (cationic amino acid transporter, y+ system), member 11
MGI:1347464	Foxg1	forkhead box G1
MGI:1347466	Foxc1	forkhead box C1
MGI:1347471	Foxd2	forkhead box D2
MGI:1347488	Foxk1	forkhead box K1
MGI:1349162	Sdc1	syndecan 1
MGI:1349164	Sdc4	syndecan 4
MGI:1349165	Sdc2	syndecan 2
MGI:1349183	Ccl21b	chemokine (C-C motif) ligand 21b
MGI:1349216	Abcd3	ATP-binding cassette, sub-family D (ALD), member 3
MGI:1349387	Spag1	sperm associated antigen 1
MGI:1349394	Map4k4	mitogen-activated protein kinase kinase kinase kinase 4
MGI:1349396	Acot1	acyl-CoA thioesterase 1
MGI:1349412	Clec4a2	C-type lectin domain family 4, member a2
MGI:1349415	Cops5	COP9 (constitutive photomorphogenic) homolog, subunit 5 (Arabidopsis thaliana)
MGI:1349419	Pdcd8	programmed cell death 8
MGI:1349423	Racgap1	Rac GTPase-activating protein 1
MGI:1349427	Exo1	exonuclease 1
MGI:1349452	Polr3e	polymerase (RNA) III (DNA directed) polypeptide E
MGI:1349467	Abcd2	ATP-binding cassette, sub-family D (ALD), member 2
MGI:1349482	Slc9a3r1	solute carrier family 9 (sodium/hydrogen exchanger), isoform 3 regulator 1
MGI:1349656	Gimap4	GTPase, IMAP family member 4
MGI:1349717	Ncor1	nuclear receptor co-repressor 1
MGI:1349763	Dpysl2	dihydropyrimidinase-like 2
MGI:1349766	Brd7	bromodomain containing 7
MGI:1350328	Ofd1	oral-facial-digital syndrome 1 gene homolog (human)
MGI:1350916	Nit1	nitrilase 1
MGI:1350918	Omd	osteomodulin
MGI:1350924	Irf5	interferon regulatory factor 5
MGI:1350926	Etv3	ets variant gene 3
MGI:1350930	Srp9	signal recognition particle 9
MGI:1350931	Tcirg1	T-cell, immune regulator 1
MGI:1351314	Slamf1	signaling lymphocytic activation molecule family member 1
MGI:1351315	Tceb3	transcription elongation factor B (SIII), polypeptide 3
MGI:1351322	Mixl1	Mix1 homeobox-like 1 (Xenopus laevis)
MGI:1351326	Nrk	Nik related kinase
MGI:1351333	Fmip	Fms interacting protein
MGI:1351338	Grm1	glutamate receptor, metabotropic 1
MGI:1351351	Casr	calcium-sensing receptor
MGI:1351473	Hrasls	HRAS-like suppressor
MGI:1351477	Cars	cysteinyl-tRNA synthetase
MGI:1351490	Dok3	docking protein 3
MGI:1351595	Insl6	insulin-like 6
MGI:1351602	Dguok	deoxyguanosine kinase
MGI:1351617	Abca3	ATP-binding cassette, sub-family A (ABC1), member 3
MGI:1351633	Ihpk1	inositol hexaphosphate kinase 1
MGI:1351634	Abcc6	ATP-binding cassette, sub-family C (CFTR/MRP), member 6
MGI:1351644	Abcc5	ATP-binding cassette, sub-family C (CFTR/MRP), member 5
MGI:1351646	Abca7	ATP-binding cassette, sub-family A (ABC1), member 7
MGI:1351659	Abcg5	ATP-binding cassette, sub-family G (WHITE), member 5
MGI:1351663	Skp2	S-phase kinase-associated protein 2 (p45)
MGI:1351668	Abca8b	ATP-binding cassette, sub-family A (ABC1), member 8b
MGI:1352449	Cxcl9	chemokine (C-X-C motif) ligand 9
MGI:1352450	Cxcl10	chemokine (C-X-C motif) ligand 10
MGI:1352452	Nr2f2	nuclear receptor subfamily 2, group F, member 2
MGI:1352453	Nr2f6	nuclear receptor subfamily 2, group F, member 6
MGI:1352454	Nr4a1	nuclear receptor subfamily 4, group A, member 1
MGI:1352456	Nr4a2	nuclear receptor subfamily 4, group A, member 2
MGI:1352457	Nr4a3	nuclear receptor subfamily 4, group A, member 3
MGI:1352460	Nr0b1	nuclear receptor subfamily 0, group B, member 1
MGI:1352462	Nr1h3	nuclear receptor subfamily 1, group H, member 3
MGI:1352463	Nr1h2	nuclear receptor subfamily 1, group H, member 2
MGI:1352464	Nr1h4	nuclear receptor subfamily 1, group H, member 4
MGI:1352465	Nr2c1	nuclear receptor subfamily 2, group C, member 1
MGI:1352466	Nr2c2	nuclear receptor subfamily 2, group C, member 2
MGI:1352467	Esr1	estrogen receptor 1 (alpha)
MGI:1352483	Mga	MAX gene associated
MGI:1352494	Hspb7	heat shock protein family, member 7 (cardiovascular)
MGI:1352501	Bcar3	breast cancer anti-estrogen resistance 3
MGI:1352507	Rabgap1l	RAB GTPase activating protein 1-like
MGI:1352629	Abcc8	ATP-binding cassette, sub-family C (CFTR/MRP), member 8
MGI:1352630	Abcc9	ATP-binding cassette, sub-family C (CFTR/MRP), member 9
MGI:1352747	Cspg5	chondroitin sulfate proteoglycan 5
MGI:1353421	Mfi2	antigen p97 (melanoma associated) identified by monoclonal antibodies 133.2 and 96.5
MGI:1353422	Spdef	SAM pointed domain containing ets transcription factor
MGI:1353438	Mapk12	mitogen-activated protein kinase 12
MGI:1353448	Eif2ak1	eukaryotic translation initiation factor 2 alpha kinase 1
MGI:1353449	Prkr	protein kinase, interferon-inducible double stranded RNA dependent
MGI:1353450	Aldh1a1	aldehyde dehydrogenase family 1, subfamily A1
MGI:1353451	Aldh3a1	aldehyde dehydrogenase family 3, subfamily A1
MGI:1353467	Cttnbp2	cortactin binding protein 2
MGI:1353470	Pdlim4	PDZ and LIM domain 4
MGI:1353474	Slc39a1	solute carrier family 39 (zinc transporter), member 1
MGI:1353496	Slc25a5	solute carrier family 25 (mitochondrial carrier, adenine nucleotide translocator), member 5
MGI:1353497	Slc25a10	solute carrier family 25 (mitochondrial carrier, dicarboxylate transporter), member 10
MGI:1353498	Slc25a3	solute carrier family 25 (mitochondrial carrier, phosphate carrier), member 3
MGI:1353510	Arhgef1	Rho guanine nucleotide exchange factor (GEF) 1
MGI:1353576	Pik3cg	phosphoinositide-3-kinase, catalytic, gamma polypeptide
MGI:1353633	Fus	fusion, derived from t(12;16) malignant liposarcoma (human)
MGI:1353651	Gnl3	guanine nucleotide binding protein-like 3 (nucleolar)
MGI:1354171	Ebi3	Epstein-Barr virus induced gene 3
MGI:1354178	Prok2	prokineticin 2
MGI:1354694	Rgs1	regulator of G-protein signaling 1
MGI:1354701	Icosl	icos ligand
MGI:1354721	Slc25a13	solute carrier family 25 (mitochondrial carrier, adenine nucleotide translocator), member 13
MGI:1354728	AF007011	EST AF007011
MGI:1354734	Rgs3	regulator of G-protein signaling 3
MGI:1354757	Atp9b	ATPas, class II, type 9B
MGI:1354910	Socs1	suppressor of cytokine signaling 1
MGI:1354945	Ppap2c	phosphatidic acid phosphatase type 2c
MGI:1354946	Mapk6	mitogen-activated protein kinase 6
MGI:1354954	Nt5c	5',3'-nucleotidase, cytosolic
MGI:1355305	Neu3	neuraminidase 3
MGI:1355318	Il27ra	interleukin 27 receptor, alpha
MGI:1355323	Slc7a8	solute carrier family 7 (cationic amino acid transporter, y+ system), member 8
MGI:1355330	Phgdh	3-phosphoglycerate dehydrogenase
MGI:1355331	Olig2	oligodendrocyte transcription factor 2
MGI:1355332	Myadm	myeloid-associated differentiation marker
MGI:1355333	Nckap1	NCK-associated protein 1
MGI:1355334	Olig1	oligodendrocyte transcription factor 1
MGI:1855690	Snrpa	small nuclear ribonucleoprotein polypeptide A
MGI:1855692	Nono	non-POU-domain-containing, octamer binding protein
MGI:1855694	G1p2	interferon, alpha-inducible protein
MGI:1858179	Nucb2	nucleobindin 2
MGI:1858200	Prg3	proteoglycan 3
MGI:1858201	Cntnap1	contactin associated protein 1
MGI:1858209	Nptx2	neuronal pentraxin 2
MGI:1858213	Clpp	caseinolytic peptidase, ATP-dependent, proteolytic subunit homolog (E. coli)
MGI:1858222	Sept9	septin 9
MGI:1858229	Ppp1r3c	protein phosphatase 1, regulatory (inhibitor) subunit 3C
MGI:1858260	Gosr1	golgi SNAP receptor complex member 1
MGI:1858415	Ddx20	DEAD (Asp-Glu-Ala-Asp) box polypeptide 20
MGI:1858420	Mcrs1	microspherule protein 1
MGI:1858422	Edg4	endothelial differentiation, lysophosphatidic acid G-protein-coupled receptor 4
MGI:1858494	Bok	Bcl-2-related ovarian killer protein
MGI:1858696	Copg	coatomer protein complex, subunit gamma
MGI:1858731	Copg2as2	coatomer protein complex, subunit gamma 2, antisense 2
MGI:1858732	Keap1	kelch-like ECH-associated protein 1
MGI:1858745	Icos	inducible T-cell co-stimulator
MGI:1858910	Ptdsr	phosphatidylserine receptor
MGI:1859016	Ddah2	dimethylarginine dimethylaminohydrolase 2
MGI:1859147	Batf	basic leucine zipper transcription factor, ATF-like
MGI:1859179	Irf3	interferon regulatory factor 3
MGI:1859251	Dctn3	dynactin 3
MGI:1859271	Htatip2	HIV-1 tat interactive protein 2, homolog (human)
MGI:1859281	Hgfac	hepatocyte growth factor activator
MGI:1859293	Sca10	spinocerebellar ataxia 10 homolog (human)
MGI:1859320	Cyhr1	cysteine and histidine rich 1
MGI:1859325	Il1f5	interleukin 1 family, member 5 (delta)
MGI:1859384	Ptgds2	prostaglandin D2 synthase 2, hematopoietic
MGI:1859396	Mefv	Mediterranean fever
MGI:1859517	B3galt4	UDP-Gal:betaGalNAc beta 1,3-galactosyltransferase, polypeptide 4
MGI:1859555	Nup210	nucleoporin 210
MGI:1859568	Cd164	CD164 antigen
MGI:1859609	Sfmbt1	Scm-like with four mbt domains 1
MGI:1859649	Ctnnal1	catenin (cadherin associated protein), alpha-like 1
MGI:1859682	Slc23a2	solute carrier family 23 (nucleobase transporters), member 2
MGI:1859709	Rgs14	regulator of G-protein signaling 14
MGI:1859821	Prdx5	peroxiredoxin 5
MGI:1859920	Ebag9	estrogen receptor-binding fragment-associated gene 9
MGI:1859980	Insm1	insulinoma-associated 1
MGI:1860076	Rnf5	ring finger protein 5
MGI:1860083	Cd320	CD320 antigen
MGI:1860085	Stk19	serine/threonine kinase 19
MGI:1860137	Gp9	glycoprotein 9 (platelet)
MGI:1860203	Cxcl11	chemokine (C-X-C motif) ligand 11
MGI:1860383	Cd160	CD160 antigen
MGI:1861231	Clec4n	C-type lectin domain family 4, member n
MGI:1861232	Clec4e	C-type lectin domain family 4, member e
MGI:1861376	Slc15a1	solute carrier family 15 (oligopeptide transporter), member 1
MGI:1861431	Clec7a	C-type lectin domain family 7, member a
MGI:1861437	Gsk3b	glycogen synthase kinase 3 beta
MGI:1861438	Gcm2	glial cells missing homolog 2 (Drosophila)
MGI:1861601	Cpsf2	cleavage and polyadenylation specific factor 2
MGI:1861722	Aldh1a3	aldehyde dehydrogenase family 1, subfamily A3
MGI:1861774	Rbms1	RNA binding motif, single stranded interacting protein 1
MGI:1888480	Ly6i	lymphocyte antigen 6 complex, locus I
MGI:1888499	Cxcl13	chemokine (C-X-C motif) ligand 13
MGI:1888504	Retnla	resistin like alpha
MGI:1888514	Cxcl14	chemokine (C-X-C motif) ligand 14
MGI:1888594	Icmt	isoprenylcysteine carboxyl methyltransferase
MGI:1888678	Otor	otoraplin
MGI:1888697	Taf9	TAF9 RNA polymerase II, TATA box binding protein (TBP)-associated factor
MGI:1888711	Cxcl4	chemokine (C-X-C motif) ligand 4
MGI:1888712	Cxcl7	chemokine (C-X-C motif) ligand 7
MGI:1888981	Smfn	small fragment nuclease
MGI:1888984	Tbx21	T-box 21
MGI:1888992	Msln	mesothelin
MGI:1888999	Angptl4	angiopoietin-like 4
MGI:1889024	Cd200r1	CD200 receptor 1
MGI:1889206	Scap2	src family associated phosphoprotein 2
MGI:1889273	Fxyd1	FXYD domain-containing ion transport regulator 1
MGI:1889507	Lrdd	leucine-rich and death domain containing
MGI:1889575	Adar	adenosine deaminase, RNA-specific
MGI:1889583	Sh3kbp1	SH3-domain kinase binding protein 1
MGI:1889595	Ppp1r1a	protein phosphatase 1, regulatory (inhibitor) subunit 1A
MGI:1889651	Cri1	CREBBP/EP300 inhibitory protein 1
MGI:1889810	Gp6	glycoprotein 6 (platelet)
MGI:1890081	Foxo3a	forkhead box O3a
MGI:1890216	Slc6a14	solute carrier family 6 (neurotransmitter transporter), member 14
MGI:1890219	Cdh23	cadherin 23 (otocadherin)
MGI:1890220	Gpr132	G protein-coupled receptor 132
MGI:1890226	Fxyd6	FXYD domain-containing ion transport regulator 6
MGI:1890357	Igf2bp1	insulin-like growth factor 2, binding protein 1
MGI:1890391	Fstl3	follistatin-like 3
MGI:1890410	Acss2	acyl-CoA synthetase short-chain family member 2
MGI:1890457	Slc15a2	solute carrier family 15 (H+/peptide transporter), member 2
MGI:1890473	Il20	interleukin 20
MGI:1890475	Il21r	interleukin 21 receptor
MGI:1890497	Plvap	plasmalemma vesicle associated protein
MGI:1890564	Dscr1	Down syndrome critical region homolog 1 (human)
MGI:1890574	Spnb4	spectrin beta 4
MGI:1890614	Dusp12	dual specificity phosphatase 12
MGI:1890682	Evi2b	ecotropic viral integration site 2b
MGI:1890695	Rab9	RAB9, member RAS oncogene family
MGI:1891221	Crtap	cartilage associated protein
MGI:1891384	Mov10l1	Moloney leukemia virus 10-like 1
MGI:1891436	Foxp3	forkhead box P3
MGI:1891456	Ripk2	receptor (TNFRSF)-interacting serine-threonine kinase 2
MGI:1891496	Jph2	junctophilin 2
MGI:1891690	Syncrip	synaptotagmin binding, cytoplasmic RNA interacting protein
MGI:1891697	Ccbp2	chemokine binding protein 2
MGI:1891698	Pnkp	polynucleotide kinase 3'- phosphatase
MGI:1891699	Stk25	serine/threonine kinase 25 (yeast)
MGI:1891700	Ncstn	nicastrin
MGI:1891824	Acin1	apoptotic chromatin condensation inducer 1
MGI:1891836	Mkks	McKusick-Kaufman syndrome protein
MGI:1891915	Mllt7	myeloid/lymphoid or mixed lineage-leukemia translocation to 7 homolog (Drosophila)
MGI:1913105	Slc28a2	solute carrier family 28 (sodium-coupled nucleoside transporter), member 2
MGI:1913125	Pias1	protein inhibitor of activated STAT 1
MGI:1913208	Carm1	coactivator-associated arginine methyltransferase 1
MGI:1913276	Ngly1	N-glycanase 1
MGI:1913287	Clec1b	C-type lectin domain family 1, member b
MGI:1913327	Aurkaip1	aurora kinase A interacting protein 1
MGI:1913356	Smpx	small muscle protein, X-linked
MGI:1913363	Apoa5	apolipoprotein A-V
MGI:1913375	Sf3b5	splicing factor 3b, subunit 5
MGI:1913391	Ifitm3	interferon induced transmembrane protein 3
MGI:1913432	Arfl4	ADP-ribosylation factor 4-like
MGI:1913472	Serpinb1a	serine (or cysteine) peptidase inhibitor, clade B, member 1a
MGI:1913506	Ssr2	signal sequence receptor, beta
MGI:1913540	Atp6v1g1	ATPase, H+ transporting, V1 subunit G isoform 1
MGI:1913714	Taf12	TAF12 RNA polymerase II, TATA box binding protein (TBP)-associated factor
MGI:1913763	Map3k7ip1	mitogen-activated protein kinase kinase kinase 7 interacting protein 1
MGI:1913765	Cul7	cullin 7
MGI:1913843	Diablo	diablo homolog (Drosophila)
MGI:1913929	Rae1	RAE1 RNA export 1 homolog (S. pombe)
MGI:1913945	Aspn	asporin
MGI:1914080	Btbd14b	BTB (POZ) domain containing 14B
MGI:1914127	Crnkl1	Crn, crooked neck-like 1 (Drosophila)
MGI:1914140	Lman2	lectin, mannose-binding 2
MGI:1914172	Rras2	related RAS viral (r-ras) oncogene homolog 2
MGI:1914197	Commd7	COMM domain containing 7
MGI:1914249	Med28	mediator of RNA polymerase II transcription, subunit 28 homolog (yeast)
MGI:1914255	Polr3k	polymerase (RNA) III (DNA directed) polypeptide K
MGI:1914280	Fancl	Fanconi anemia, complementation group L
MGI:1914291	Oxct1	3-oxoacid CoA transferase 1
MGI:1914304	Paics	phosphoribosylaminoimidazole carboxylase, phosphoribosylaminoribosylaminoimidazole, succinocarboxamide synthetase
MGI:1914315	Polr3d	polymerase (RNA) III (DNA directed) polypeptide D
MGI:1914324	2610528O22Rik	RIKEN cDNA 2610528O22 gene
MGI:1914365	Rpl14	ribosomal protein L14
MGI:1914401	Psmd9	proteasome (prosome, macropain) 26S subunit, non-ATPase, 9
MGI:1914404	Mtdh	Metadherin
MGI:1914454	Eif2s2	eukaryotic translation initiation factor 2, subunit 2 (beta)
MGI:1914491	Smc6l1	SMC6 structural maintenance of chromosomes 6-like 1 (yeast)
MGI:1914625	Qprt	quinolinate phosphoribosyltransferase
MGI:1914632	Brd3	bromodomain containing 3
MGI:1914647	Erp29	endoplasmic reticulum protein 29
MGI:1914668	Ppil4	peptidylprolyl isomerase (cyclophilin)-like 4
MGI:1914710	Decr1	2,4-dienoyl CoA reductase 1, mitochondrial
MGI:1914720	Abcg8	ATP-binding cassette, sub-family G (WHITE), member 8
MGI:1914797	Slc39a8	solute carrier family 39 (metal ion transporter), member 8
MGI:1914869	1700021I09Rik	RIKEN cDNA 1700021I09 gene
MGI:1914944	Ccdc2	coiled-coil domain containing 2
MGI:1915213	Npc2	Niemann Pick type C2
MGI:1915217	Pold3	polymerase (DNA-directed), delta 3, accessory subunit
MGI:1915261	Snrpg	small nuclear ribonucleoprotein polypeptide G
MGI:1915268	Col4a3bp	procollagen, type IV, alpha 3 (Goodpasture antigen) binding protein
MGI:1915443	Rpl24	ribosomal protein L24
MGI:1915448	Ndufb2	NADH dehydrogenase (ubiquinone) 1 beta subcomplex, 2
MGI:1915525	Rpa1	replication protein A1
MGI:1915528	Ddx39	DEAD (Asp-Glu-Ala-Asp) box polypeptide 39
MGI:1915555	Moap1	modulator of apoptosis 1
MGI:1915587	Crip2	cysteine rich protein 2
MGI:1915725	Ssna1	Sjogren's syndrome nuclear autoantigen 1
MGI:1915756	Ctnnbip1	catenin beta interacting protein 1
MGI:1915775	Evc2	Ellis van Creveld syndrome 2 homolog (human)
MGI:1915902	Map3k7ip2	mitogen-activated protein kinase kinase kinase 7 interacting protein 2
MGI:1915912	Scgb3a1	secretoglobin, family 3A, member 1
MGI:1915963	Ifitm1	interferon induced transmembrane protein 1
MGI:1916026	Taf11	TAF11 RNA polymerase II, TATA box binding protein (TBP)-associated factor
MGI:1916127	Maf1	MAF1 homolog (S. cerevisiae)
MGI:1916218	Cdan1	congenital dyserythropoietic anemia, type I (human)
MGI:1916348	1810009M01Rik	RIKEN cDNA 1810009M01 gene
MGI:1916396	Gsdmdc1	gasdermin domain containing 1
MGI:1916415	Cd209b	CD209b antigen
MGI:1916503	Hspb2	heat shock protein 2
MGI:1916507	Elf2	E74-like factor 2
MGI:1916513	Rfc3	replication factor C (activator 1) 3
MGI:1916617	Glrx2	glutaredoxin 2 (thioltransferase)
MGI:1916698	Prss21	protease, serine, 21
MGI:1916732	Nup35	nucleoporin 35
MGI:1916835	Hfe2	hemochromatosis type 2 (juvenile) (human homolog)
MGI:1916867	Pitrm1	pitrilysin metallepetidase 1
MGI:1916882	Arhgef12	Rho guanine nucleotide exchange factor (GEF) 12
MGI:1916884	Clybl	citrate lyase beta like
MGI:1916885	Dapk1	death associated protein kinase 1
MGI:1916952	Ndufaf1	NADH dehydrogenase (ubiquinone) 1 alpha subcomplex, assembly factor 1
MGI:1916964	Tfpt	TCF3 (E2A) fusion partner
MGI:1916983	Paox	polyamine oxidase (exo-N4-amino)
MGI:1917064	Prss32	protease, serine, 32
MGI:1917128	Snrpf	small nuclear ribonucleoprotein polypeptide F
MGI:1917162	Nup43	nucleoporin 43
MGI:1917243	Chn2	chimerin (chimaerin) 2
MGI:1917336	Cysltr2	cysteinyl leukotriene receptor 2
MGI:1917372	Mllt3	myeloid/lymphoid or mixed lineage-leukemia translocation to 3 homolog (Drosophila)
MGI:1917458	Crsp3	cofactor required for Sp1 transcriptional activation, subunit 3
MGI:1917497	Psmd1	proteasome (prosome, macropain) 26S subunit, non-ATPase, 1
MGI:1917592	Ptges2	prostaglandin E synthase 2
MGI:1917606	St13	suppression of tumorigenicity 13
MGI:1917611	Lman1	lectin, mannose-binding, 1
MGI:1917650	Adamdec1	ADAM-like, decysin 1
MGI:1917689	Taf15	TAF15 RNA polymerase II, TATA box binding protein (TBP)-associated factor
MGI:1917777	Stambp	Stam binding protein
MGI:1917838	Pnrc1	proline-rich nuclear receptor coactivator 1
MGI:1917923	Prdm16	PR domain containing 16
MGI:1917976	Angptl6	angiopoietin-like 6
MGI:1918054	Pgrmc2	progesterone receptor membrane component 2
MGI:1918089	P2ry12	purinergic receptor P2Y, G-protein coupled 12
MGI:1918090	Slc22a16	solute carrier family 22 (organic cation transporter), member 16
MGI:1918178	Rnf36	ring finger protein 36
MGI:1918201	Spata1	spermatogenesis associated 1
MGI:1918849	Senp8	SUMO/sentrin specific peptidase 8
MGI:1918951	Pnpt1	polyribonucleotide nucleotidyltransferase 1
MGI:1919104	Dpep3	dipeptidase 3
MGI:1919154	Paqr7	progestin and adipoQ receptor family member VII
MGI:1919164	Antxr2	anthrax toxin receptor 2
MGI:1919241	Ercc8	excision repaiross-complementing rodent repair deficiency, complementation group 8
MGI:1919260	Serpinb9g	serine (or cysteine) peptidase inhibitor, clade B, member 9g
MGI:1919330	2010317E24Rik	RIKEN cDNA 2010317E24 gene
MGI:1919429	Fbxl2	F-box and leucine-rich repeat protein 2
MGI:1919443	Sfrs2ip	splicing factor, arginine/serine-rich 2, interacting protein
MGI:1919599	Dusp3	dual specificity phosphatase 3 (vaccinia virus phosphatase VH1-related)
MGI:1919666	Lrpprc	leucine-rich PPR-motif containing
MGI:1919722	Slc16a10	solute carrier family 16 (monocarboxylic acid transporters), member 10
MGI:1919822	Spats2	spermatogenesis associated, serine-rich 2
MGI:1919963	Angptl1	angiopoietin-like 1
MGI:1920212	Ecgf1	endothelial cell growth factor 1 (platelet-derived)
MGI:1920231	Prkrir	protein-kinase, interferon-inducible double stranded RNA dependent inhibitor, repressor of (P58 repressor)
MGI:1920336	Rps6ka5	ribosomal protein S6 kinase, polypeptide 5
MGI:1920382	Slc25a16	solute carrier family 25 (mitochondrial carrier, Graves disease autoantigen), member 16
MGI:1920407	Gulp1	GULP, engulfment adaptor PTB domain containing 1
MGI:1920534	Ddit4l	DNA-damage-inducible transcript 4-like
MGI:1920590	Nptxr	neuronal pentraxin receptor
MGI:1920692	Hspa12a	heat shock 70kDa protein 12A
MGI:1920719	Rnf38	ring finger protein 38
MGI:1920904	Ccrl2	chemokine (C-C motif) receptor-like 2
MGI:1920940	Glipr1	GLI pathogenesis-related 1 (glioma)
MGI:1920955	Mark4	MAP/microtubule affinity-regulating kinase 4
MGI:1921164	Irak3	interleukin-1 receptor-associated kinase 3
MGI:1921241	Spg3a	spastic paraplegia 3A homolog (human)
MGI:1921272	3930401K13Rik	RIKEN cDNA 3930401K13 gene
MGI:1921318	Asz1	ankyrin repeat, SAM and basic leucine zipper domain containing 1
MGI:1921367	Actr3	ARP3 actin-related protein 3 homolog (yeast)
MGI:1921430	Muc5b	mucin 5, subtype B, tracheobronchial
MGI:1921447	Gtf2e1	general transcription factor II E, polypeptide 1 (alpha subunit)
MGI:1921494	Atg7l	autophagy-related 7-like (yeast)
MGI:1921527	Chic2	cysteine-rich hydrophobic domain 2
MGI:1921719	Taf7l	TAF7-like RNA polymerase II, TATA box binding protein (TBP)-associated factor
MGI:1921732	Ifitm7	interferon induced transmembrane protein 7
MGI:1921761	Lrrc17	leucine rich repeat containing 17
MGI:1921853	Cd200r3	CD200 receptor 3
MGI:1921997	Ddit4	DNA-damage-inducible transcript 4
MGI:1922019	Pik3cb	phosphatidylinositol 3-kinase, catalytic, beta polypeptide
MGI:1922708	Cklf	chemokine-like factor
MGI:1922967	Cul5	cullin 5
MGI:1923151	Mitc1	MAD homolog 4 interacting transcription coactivator 1
MGI:1923273	5830403L16Rik	RIKEN cDNA 5830403L16 gene
MGI:1923294	Luzp5	leucine zipper protein 5
MGI:1923364	5830484A20Rik	RIKEN cDNA 5830484A20 gene
MGI:1923373	Gpsm2	G-protein signalling modulator 2 (AGS3-like, C. elegans)
MGI:1923396	Stx16	syntaxin 16
MGI:1923717	Msrb2	methionine sulfoxide reductase B2
MGI:1923724	Spon2	spondin 2, extracellular matrix protein
MGI:1923810	Prss8	protease, serine, 8 (prostasin)
MGI:1923813	Qrsl1	glutaminyl-tRNA synthase (glutamine-hydrolyzing)-like 1
MGI:1923816	1500005K14Rik	RIKEN cDNA 1500005K14 gene
MGI:1923864	Immt	inner membrane protein, mitochondrial
MGI:1924057	Phf12	PHD finger protein 12
MGI:1924104	Gpr30	G protein-coupled receptor 30
MGI:1924657	Rab35	RAB35, member RAS oncogene family
MGI:1924885	Socs6	suppressor of cytokine signaling 6
MGI:1925503	Map4k5	mitogen-activated protein kinase kinase kinase kinase 5
MGI:1925619	Icam4	intercellular adhesion molecule 4, Landsteiner-Wiener blood group
MGI:1925638	Mvp	major vault protein
MGI:1925723	Scap1	src family associated phosphoprotein 1
MGI:1926047	Ndor1	NADPH dependent diflavin oxidoreductase 1
MGI:1926097	Prima1	proline rich membrane anchor 1
MGI:1926157	Atf6	activating transcription factor 6
MGI:1926189	Emilin1	elastin microfibril interfacer 1
MGI:1926209	Dek	DEK oncogene (DNA binding)
MGI:1926218	Cysltr1	cysteinyl leukotriene receptor 1
MGI:1926227	Nup160	nucleoporin 160
MGI:1926334	Ppp2r1a	protein phosphatase 2 (formerly 2A), regulatory subunit A (PR 65), alpha isoform
MGI:1926387	Cdon	cell adhesion molecule-related/down-regulated by oncogenes
MGI:1926479	Lat2	linker for activation of T cells family, member 2
MGI:1926483	Pvrl1	poliovirus receptor-related 1
MGI:1926594	P2ry4	pyrimidinergic receptor P2Y, G-protein coupled, 4
MGI:1926923	Bcmo1	beta-carotene 15,15'-monooxygenase
MGI:1926944	Calcrl	calcitonin receptor-like
MGI:1927070	Dusp10	dual specificity phosphatase 10
MGI:1927073	Slc29a1	solute carrier family 29 (nucleoside transporters), member 1
MGI:1927110	D1Bwg0491e	DNA segment, Chr 1, Brigham & Women's Genetics 0491 expressed
MGI:1927140	Git1	G protein-coupled receptor kinase-interactor 1
MGI:1927170	Spata5	spermatogenesis associated 5
MGI:1927186	Nt5c3	5'-nucleotidase, cytosolic III
MGI:1927222	Diap3	diaphanous homolog 3 (Drosophila)
MGI:1927223	Pard6a	par-6 (partitioning defective 6,) homolog alpha (C. elegans)
MGI:1927235	Mbtps1	membrane-bound transcription factor peptidase, site 1
MGI:1927238	Mllt1	myeloid/lymphoid or mixed lineage-leukemia translocation to 1 homolog (Drosophila)
MGI:1927243	Rala	v-ral simian leukemia viral oncogene homolog A (ras related)
MGI:1927470	Spag5	sperm associated antigen 5
MGI:1927489	Pdlim5	PDZ and LIM domain 5
MGI:1927505	Tas1r1	taste receptor, type 1, member 1
MGI:1927549	Foxb1	forkhead box B1
MGI:1927593	Ptges	prostaglandin E synthase
MGI:1927594	Itm2c	integral membrane protein 2C
MGI:1927667	Defb4	defensin beta 4
MGI:1928099	Pglyrp2	peptidoglycan recognition protein 2
MGI:1928268	Ireb2	iron responsive element binding protein 2
MGI:1928369	Slc2a5	solute carrier family 2 (facilitated glucose transporter), member 5
MGI:1928377	Elf4	E74-like factor 4 (ets domain transcription factor)
MGI:1928394	Frap1	FK506 binding protein 12-rapamycin associated protein 1
MGI:1928480	Acpp	acid phosphatase, prostate
MGI:1928486	Tdo2	tryptophan 2,3-dioxygenase
MGI:1928753	Pfdn5	prefoldin 5
MGI:1928953	Ccl24	chemokine (C-C motif) ligand 24
MGI:1929004	Stk4	serine/threonine kinase 4
MGI:1929022	Praf1	polymerase (RNA) I associated factor 1
MGI:1929083	Sectm1	secreted and transmembrane 1
MGI:1929084	Fbxo3	F-box only protein 3
MGI:1929092	Rbm14	RNA binding motif protein 14
MGI:1929100	Stam2	signal transducing adaptor molecule (SH3 domain and ITAM motif) 2
MGI:1929270	Dstn	destrin
MGI:1929461	Lphn1	latrophilin 1
MGI:1929464	Sec11l1	Sec11-like 1 (S. cerevisiae)
MGI:1929469	Edg7	endothelial differentiation, lysophosphatidic acid G-protein-coupled receptor 7
MGI:1929512	Litaf	LPS-induced TN factor
MGI:1929608	Aatf	apoptosis antagonizing transcription factor
MGI:1929612	Ikbke	inhibitor of kappaB kinase epsilon
MGI:1929691	Slc15a3	solute carrier family 15, member 3
MGI:1929693	Slc37a2	solute carrier family 37 (glycerol-3-phosphate transporter), member 2
MGI:1929701	Metap2	methionine aminopeptidase 2
MGI:1929866	Rgs20	regulator of G-protein signaling 20
MGI:1929897	Clstn2	calsyntenin 2
MGI:1929915	Ncoa6	nuclear receptor coactivator 6
MGI:1930025	Psors1c2	psoriasis susceptibility 1 candidate 2 (human)
MGI:1930042	Dclre1a	DNA cross-link repair 1A, PSO2 homolog (S. cerevisiae)
MGI:1930076	Rps6ka4	ribosomal protein S6 kinase, polypeptide 4
MGI:1930088	Clcf1	cardiotrophin-like cytokine factor 1
MGI:1930124	Apom	apolipoprotein M
MGI:1930125	Pdcd1lg2	programmed cell death 1 ligand 2
MGI:1930146	Pmaip1	phorbol-12-myristate-13-acetate-induced protein 1
MGI:1930768	Arid3b	AT rich interactive domain 3B (Bright like)
MGI:1930867	Apbh	androgen-binding protein eta
MGI:1930923	Slurp1	secreted Ly6/Plaur domain containing 1
MGI:1931130	Tac4	tachykinin 4
MGI:1931144	Parva	parvin, alpha
MGI:1931428	Klrb1d	killer cell lectin-like receptor subfamily B member 1D
MGI:1931457	Cblc	Casitas B-lineage lymphoma c
MGI:1931465	Pycard	PYD and CARD domain containing
MGI:1931526	Hist1h1c	histone 1, H1c
MGI:1931551	Rhoj	ras homolog gene family, member J
MGI:1931787	Scyl1	SCY1-like 1 (S. cerevisiae)
MGI:1931834	Nckipsd	NCK interacting protein with SH3 domain
MGI:1931874	Dnajb1	DnaJ (Hsp40) homolog, subfamily B, member 1
MGI:1932052	Chia	chitinase, acidic
MGI:1932115	Papolb	poly (A) polymerase beta (testis specific)
MGI:1932286	Egln1	EGL nine homolog 1 (C. elegans)
MGI:1932288	Egln3	EGL nine homolog 3 (C. elegans)
MGI:1932339	Sf3b1	splicing factor 3b, subunit 1
MGI:1932395	Rrbp1	ribosome binding protein 1
MGI:1932475	Siglecl1	SIGLEC-like 1
MGI:1932575	Sp6	trans-acting transcription factor 6
MGI:1932576	Akap12	A kinase (PRKA) anchor protein (gravin) 12
MGI:1932622	Cstf2t	cleavage stimulation factor, 3' pre-RNA subunit 2, tau
MGI:1932682	Cxcl16	chemokine (C-X-C motif) ligand 16
MGI:1933111	Apobec3	apolipoprotein B editing complex 3
MGI:1933162	Lrba	LPS-responsive beige-like anchor
MGI:1933199	Setbp1	SET binding protein 1
MGI:1933289	Gtf2a2	general transcription factor II A, 2
MGI:1933365	Sytl1	synaptotagmin-like 1
MGI:1933382	Ifitm2	interferon induced transmembrane protein 2
MGI:1933383	Gpr109b	G protein-coupled receptor 109B
MGI:1933427	Akr1c6	aldo-keto reductase family 1, member C6
MGI:1933532	Slc12a9	solute carrier family 12 (potassium/chloride transporters), member 9
MGI:1933533	Hamp1	hepcidin antimicrobial peptide 1
MGI:1933546	Tas1r2	taste receptor, type 1, member 2
MGI:1933947	Rtn1	reticulon 1
MGI:1933966	Mcam	melanoma cell adhesion molecule
MGI:1934569	Cpxm1	carboxypeptidase X 1 (M14 family)
MGI:1934582	Cxcr6	chemokine (C-X-C motif) receptor 6
MGI:1934765	Gpnmb	glycoprotein (transmembrane) nmb
MGI:2135548	Il24	interleukin 24
MGI:2135589	Clec2d	C-type lectin domain family 2, member d
MGI:2135607	Sirt1	sirtuin 1 ((silent mating type information regulation 2, homolog) 1 (S. cerevisiae)
MGI:2135608	Pard3	par-3 (partitioning defective 3) homolog (C. elegans)
MGI:2135637	Park7	Parkinson disease (autosomal recessive, early onset) 7
MGI:2135756	Hspb8	heat shock 27kDa protein 8
MGI:2135760	Sgpp1	sphingosine-1-phosphate phosphatase 1
MGI:2135874	Cpn1	carboxypeptidase N, polypeptide 1
MGI:2135951	Mpv17l	Mpv17 transgene, kidney disease mutant-like
MGI:2135962	Gorasp2	golgi reassembly stacking protein 2
MGI:2136886	Rtn4r	reticulon 4 receptor
MGI:2137361	Slc28a3	solute carrier family 28 (sodium-coupled nucleoside transporter), member 3
MGI:2137410	Peo1	progressive external ophthalmoplegia 1 (human)
MGI:2137670	Csda	cold shock domain protein A
MGI:2139014	Osbpl6	oxysterol binding protein-like 6
MGI:2139135	Anapc2	anaphase promoting complex subunit 2
MGI:2139422	Duox1	dual oxidase 1
MGI:2139667	Dpyd	dihydropyrimidine dehydrogenase
MGI:2139714	Lphn2	latrophilin 2
MGI:2140175	Ldlrap1	low density lipoprotein receptor adaptor protein 1
MGI:2140260	Pcsk9	proprotein convertase subtilisin/kexin type 9
MGI:2140592	Cdw92	CDW92 antigen
MGI:2141874	Plekhg2	pleckstrin homology domain containing, family G (with RhoGef domain) member 2
MGI:2141917	Prkd2	protein kinase D2
MGI:2141990	Nalp6	NACHT, leucine rich repeat and PYD containing 6
MGI:2142346	Strn4	striatin, calmodulin binding protein 4
MGI:2142598	Slc7a6	solute carrier family 7 (cationic amino acid transporter, y+ system), member 6
MGI:2144271	Rilp	Rab interacting lysosomal protein
MGI:2144727	Ddx1	DEAD (Asp-Glu-Ala-Asp) box polypeptide 1
MGI:2145420	Akr1c18	aldo-keto reductase family 1, member C18
MGI:2145950	Scrib	scribbled homolog (Drosophila)
MGI:2146430	Cblb	Casitas B-lineage lymphoma b
MGI:2146616	Eaf2	ELL associated factor 2
MGI:2146620	Srl	sarcalumenin
MGI:2147269	Slc39a3	solute carrier family 39 (zinc transporter), member 3
MGI:2147834	Slc6a8	solute carrier family 6 (neurotransmitter transporter, creatine), member 8
MGI:2148066	Slc38a5	solute carrier family 38, member 5
MGI:2148922	Ehmt2	euchromatic histone lysine N-methyltransferase 2
MGI:2148924	Clic1	chloride intracellular channel 1
MGI:2149010	Dock2	dedicator of cyto-kinesis 2
MGI:2149330	Slc5a5	solute carrier family 5 (sodium iodide symporter), member 5
MGI:2149820	Nans	N-acetylneuraminic acid synthase (sialic acid synthase)
MGI:2149961	Pawr	PRKC, apoptosis, WT1, regulator
MGI:2150383	Cgb	chorionic gonadotropin beta
MGI:2150386	Tes3	testis derived transcript 3
MGI:2150641	Edg8	endothelial differentiation, sphingolipid G-protein-coupled receptor, 8
MGI:2151253	Calca	calcitonin/calcitonin-related polypeptide, alpha
MGI:2152290	Epdr1	ependymin related protein 1 (zebrafish)
MGI:2152346	Taf4a	TAF4A RNA polymerase II, TATA box binding protein (TBP)-associated factor
MGI:2152389	Ivns1abp	influenza virus NS1A binding protein
MGI:2152414	Ipo7	importin 7
MGI:2152907	Colec12	collectin sub-family member 12
MGI:2153040	Matp	membrane associated transporter protein
MGI:2153070	Synpo2	synaptopodin 2
MGI:2153183	Kcnn3	potassium intermediate/small conductance calcium-activated channel, subfamily N, member 3
MGI:2153249	Cd300d	Cd300D antigen
MGI:2153463	Lgr8	leucine-rich repeat-containing G protein-coupled receptor 8
MGI:2153470	Scgb3a2	secretoglobin, family 3A, member 2
MGI:2153518	Otx3	orthodenticle homolog 3 (Drosophila)
MGI:2153568	Sp7	trans-acting transcription factor 7
MGI:2153588	Ppp1r3a	protein phosphatase 1, regulatory (inhibitor) subunit 3A
MGI:2153710	Bhlhb4	basic helix-loop-helix domain containing, class B4
MGI:2154090	Igsf8	immunoglobulin superfamily, member 8
MGI:2154952	Ripk3	receptor-interacting serine-threonine kinase 3
MGI:2155888	Il17e	interleukin 17E
MGI:2156765	Stard5	StAR-related lipid transfer (START) domain containing 5
MGI:2157166	Rp9h	retinitis pigmentosa 9 homolog (human)
MGI:2157785	Peg10	paternally expressed 10
MGI:2157942	Cd209a	CD209a antigen
MGI:2157947	Cd209d	CD209d antigen
MGI:2158417	Plekhk1	pleckstrin homology domain containing, family K member 1
MGI:2158492	Eraf	erythroid associated factor
MGI:2159324	Cln6	ceroid-lipofuscinosis, neuronal 6
MGI:2159682	Havcr2	hepatitis A virus cellular receptor 2
MGI:2159727	Il17rd	interleukin 17 receptor D
MGI:2177523	Olfr140	olfactory receptor 140
MGI:2178076	Lypla3	lysophospholipase 3
MGI:2178103	Arhgdia	Rho GDP dissociation inhibitor (GDI) alpha
MGI:2178742	Stab1	stabilin 1
MGI:2179523	Fcgr3a	Fc fragment of IgG, low affinity IIIa, receptor
MGI:2180021	Cd207	CD 207 antigen
MGI:2180307	Hps5	Hermansky-Pudlak syndrome 5 homolog (human)
MGI:2180511	Il31ra	interleukin 31 receptor A
MGI:2180674	Klra17	killer cell lectin-like receptor, subfamily A, member 17
MGI:2182474	Irak4	interleukin-1 receptor-associated kinase 4
MGI:2182585	Crsp6	cofactor required for Sp1 transcriptional activation, subunit 6
MGI:2183441	Psat1	phosphoserine aminotransferase 1
MGI:2183451	Rab40b	Rab40b, member RAS oncogene family
MGI:2183535	Pscdbp	pleckstrin homology, Sec7 and coiled-coil domains, binding protein
MGI:2183703	Nav3	neuron navigator 3
MGI:2183926	Cd276	CD276 antigen
MGI:2384298	Sbno1	sno, strawberry notch homolog 1 (Drosophila)
MGI:2384802	Eif2b1	eukaryotic translation initiation factor 2B, subunit 1 (alpha)
MGI:2384818	Mtss1	metastasis suppressor 1
MGI:2384916	Slc5a8	solute carrier family 5 (iodide transporter), member 8
MGI:2385001	Plekhc1	pleckstrin homology domain containing, family C (with FERM domain) member 1
MGI:2385025	Alg12	asparagine-linked glycosylation 12 homolog (yeast, alpha-1,6-mannosyltransferase)
MGI:2385071	Etf1	eukaryotic translation termination factor 1
MGI:2385311	Dlat	dihydrolipoamide S-acetyltransferase (E2 component of pyruvate dehydrogenase complex)
MGI:2385317	Tceal1	transcription elongation factor A (SII)-like 1
MGI:2385321	Cchcr1	coiled-coil alpha-helical rod protein 1
MGI:2385656	Acsbg1	acyl-CoA synthetase bubblegum family member 1
MGI:2385803	Shkbp1	Sh3kbp1 binding protein 1
MGI:2385902	Picalm	phosphatidylinositol binding clathrin assembly protein
MGI:2385955	Defb19	defensin beta 19
MGI:2387100	Dusp7	dual specificity phosphatase 7
MGI:2387123	Lnpep	leucyl/cystinyl aminopeptidase
MGI:2387631	Nupl2	nucleoporin like 2
MGI:2388097	Taf3	TAF3 RNA polymerase II, TATA box binding protein (TBP)-associated factor
MGI:2388363	Otop1	otopetrin 1
MGI:2429409	Afm	afamin
MGI:2429603	Irak2	interleukin-1 receptor-associated kinase 2
MGI:2429763	Dock3	dedicator of cyto-kinesis 3
MGI:2429770	Nle1	notchless homolog 1 (Drosophila)
MGI:2441659	Lamp3	lysosomal-associated membrane protein 3
MGI:2441856	Sf3b2	splicing factor 3b, subunit 2
MGI:2442192	Eea1	early endosome antigen 1
MGI:2442359	Cd300lf	CD300 antigen like family member F
MGI:2442415	Myst3	MYST histone acetyltransferase (monocytic leukemia) 3
MGI:2442564	Lass6	longevity assurance homolog 6 (S. cerevisiae)
MGI:2442631	Mobk1b	MOB1, Mps One Binder kinase activator-like 1B (yeast)
MGI:2442836	Brip1	BRCA1 interacting protein C-terminal helicase 1
MGI:2442965	A630024B12Rik	RIKEN cDNA A630024B12 gene
MGI:2442988	Arfgef1	ADP-ribosylation factor guanine nucleotide-exchange factor 1(brefeldin A-inhibited)
MGI:2443028	Taf2	TAF2 RNA polymerase II, TATA box binding protein (TBP)-associated factor
MGI:2443065	Agps	alkylglycerone phosphate synthase
MGI:2443157	Mib1	mindbomb homolog 1 (Drosophila)
MGI:2443181	Dlgap2	discs, large (Drosophila) homolog-associated protein 2
MGI:2443480	Als4	amyotrophic lateral sclerosis 4 homolog (human)
MGI:2443573	Lefty2	Left-right determination factor 2
MGI:2443630	Siglec10	sialic acid binding Ig-like lectin 10
MGI:2443767	Aaas	achalasia, adrenocortical insufficiency, alacrimia
MGI:2444418	Scara3	scavenger receptor class A, member 3
MGI:2444611	Ipo8	importin 8
MGI:2444846	Negr1	neuronal growth regulator 1
MGI:2444911	Slc25a29	solute carrier family 25 (mitochondrial carrier, palmitoylcarnitine transporter), member 29
MGI:2444934	Ppargc1b	peroxisome proliferative activated receptor, gamma, coactivator 1 beta
MGI:2445019	Pik3c3	phosphoinositide-3-kinase, class 3
MGI:2445160	Kcnh8	potassium voltage-gated channel, subfamily H (eag-related), member 8
MGI:2445289	Plac8	placenta-specific 8
MGI:2445361	Serpinb1b	serine (or cysteine) peptidase inhibitor, clade B, member 1b
MGI:2445415	Pknox2	Pbx/knotted 1 homeobox 2
MGI:2446219	Arhgef16	Rho guanine nucleotide exchange factor (GEF) 16
MGI:2446700	St18	suppression of tumorigenicity 18
MGI:2447160	Cklfsf2a	chemokine-like factor super family 2A
MGI:2447763	Dnd1	dead end homolog 1 (zebrafish)
MGI:2448322	Hist1h3d	histone1, H3d
MGI:2449119	A2m	alpha-2-macroglobulin
MGI:2449205	Nr1d2	nuclear receptor subfamily 1, group D, member 2
MGI:2449455	Scarf1	scavenger receptor class F, member 1
MGI:2449712	Fev	FEV (ETS oncogene family)
MGI:2450123	Prss27	protease, serine 27
MGI:2450125	Atp10d	ATPase, Class V, type 10D
MGI:2450529	Pilra	paired immunoglobin-like type 2 receptor alpha
MGI:2651568	Klhdc3	kelch domain containing 3
MGI:2653833	Cias1	cold autoinflammatory syndrome 1 homolog (human)
MGI:2654575	Cybrd1	cytochrome b reductase 1
MGI:2655562	Eltd1	EGF, latrophilin seven transmembrane domain containing 1
MGI:2661187	Dmn	desmuslin
MGI:2665170	P2rx2	purinergic receptor P2X, ligand-gated ion channel, 2
MGI:2667185	Myo18a	myosin XVIIIa
MGI:2670976	Fez1	fasciculation and elongation protein zeta 1 (zygin I)
MGI:2673874	P2ry6	pyrimidinergic receptor P2Y, G-protein coupled, 6
MGI:2675494	Gzmn	granzyme N
MGI:2676458	Birc7	baculoviral IAP repeat-containing 7 (livin)
MGI:2680765	Hcrtr2	hypocretin (orexin) receptor 2
MGI:2681107	Siglec5	sialic acid binding Ig-like lectin 5
MGI:2684326	Slc39a2	solute carrier family 39 (zinc transporter), member 2
MGI:2684847	Gm1	gene model 1, (NCBI)
MGI:2684993	Cyt1	cytokine like 1
MGI:2685303	Gimap8	GTPase, IMAP family member 8
MGI:2685589	Parp4	poly (ADP-ribose) polymerase family, member 4
MGI:2685715	Heca	headcase homolog (Drosophila)
MGI:2685945	Pstk	phosphoseryl-tRNA kinase
MGI:2687325	Pigs	phosphatidylinositol glycan, class S
MGI:3036289	Cd200r4	Cd200 receptor 4
MGI:3039602	Cd226	CD226 antigen
MGI:3045421	Ank	progressive ankylosis
MGI:3046173	Pcnt1	pericentrin 1
MGI:700006	Dbnl	drebrin-like
MGI:700010	Sh3gl1	SH3-domain GRB2-like 1
MGI:700012	Ostf1	osteoclast stimulating factor 1
MGI:87853	a	nonagouti
MGI:87859	Abl1	v-abl Abelson murine leukemia oncogene 1
MGI:87862	Abpa	androgen binding protein alpha
MGI:87870	Acat1	acetyl-Coenzyme A acetyltransferase 1
MGI:87874	Ace	angiotensin I converting enzyme (peptidyl-dipeptidase A) 1
MGI:87878	Apoc4	apolipoprotein C-IV
MGI:87879	Aco1	aconitase 1
MGI:87881	Acp1	acid phosphatase 1, soluble
MGI:87882	Acp2	acid phosphatase 2, lysosomal
MGI:87883	Acp5	acid phosphatase 5, tartrate resistant
MGI:87904	Actb	actin, beta, cytoplasmic
MGI:87906	Actg1	actin, gamma, cytoplasmic 1
MGI:87909	Acta2	actin, alpha 2, smooth muscle, aorta
MGI:87911	Acvr1	activin A receptor, type 1
MGI:87912	Acvr2b	activin receptor IIB
MGI:87914	Aspa	aspartoacylase (aminoacylase) 2
MGI:87920	Adfp	adipose differentiation related protein
MGI:87930	Adk	adenosine kinase
MGI:87931	Adn	adipsin
MGI:87935	Adra2b	adrenergic receptor, alpha 2b
MGI:87936	Adra2c	adrenergic receptor, alpha 2c
MGI:87937	Adrb1	adrenergic receptor, beta 1
MGI:87940	Adrbk1	adrenergic receptor kinase, beta 1
MGI:87947	Adssl1	adenylosuccinate synthetase like 1
MGI:87951	Afp	alpha fetoprotein
MGI:87964	Agtr1	angiotensin receptor 1
MGI:87965	Agtr1b	angiotensin receptor 1b
MGI:87966	Agtr2	angiotensin II receptor, type 2
MGI:87984	Akp3	alkaline phosphatase 3, intestine, not Mn requiring
MGI:87986	Akt1	thymoma viral proto-oncogene 1
MGI:87991	Alb1	albumin 1
MGI:88002	Ambp	alpha 1 microglobulin/bikunin
MGI:88005	Amelx	amelogenin X chromosome
MGI:88006	Amh	anti-Mullerian hormone
MGI:88017	Mat1a	methionine adenosyltransferase I, alpha
MGI:88020	Amy2	amylase 2, pancreatic
MGI:88024	Ank1	ankyrin 1, erythroid
MGI:88025	Ank2	ankyrin 2, brain
MGI:88026	Ank3	ankyrin 3, epithelial
MGI:88030	Anxa4	annexin A4
MGI:88035	Aox1	aldehyde oxidase 1
MGI:88038	Fabp4	fatty acid binding protein 4, adipocyte
MGI:88042	Apex1	apurinic/apyrimidinic endonuclease 1
MGI:88049	Apoa1	apolipoprotein A-I
MGI:88052	Apob	apolipoprotein B
MGI:88058	Apoh	apolipoprotein H
MGI:88059	App	amyloid beta (A4) precursor protein
MGI:88065	Araf	v-raf murine sarcoma 3611 viral oncogene homolog
MGI:88070	Arg1	arginase 1, liver
MGI:88075	Arsb	arylsulfatase B
MGI:88077	Arsa	arylsulfatase A
MGI:88095	Serpinc1	serine (or cysteine) peptidase inhibitor, clade C (antithrombin), member 1
MGI:88096	Atf4	activating transcription factor 4
MGI:88116	Atp6v0c	ATPase, H+ transporting, V0 subunit C
MGI:88117	Slc7a1	solute carrier family 7 (cationic amino acid transporter, y+ system), member 1
MGI:88121	Avp	arginine vasopressin
MGI:88127	B2m	beta-2 microglobulin
MGI:88135	Tff1	trefoil factor 1
MGI:88138	Bcl2	B-cell leukemia/lymphoma 2
MGI:88139	Bcl2l1	Bcl2-like 1
MGI:88140	Bcl3	B-cell leukemia/lymphoma 3
MGI:88144	Bdkrb1	bradykinin receptor, beta 1
MGI:88151	Glb1	galactosidase, beta 1
MGI:88158	Bgn	biglycan
MGI:88175	Manba	mannosidase, beta A, lysosomal
MGI:88180	Bmp4	bone morphogenetic protein 4
MGI:88182	Bmp6	bone morphogenetic protein 6
MGI:88208	Bsg	basigin
MGI:88222	Bzrp	benzodiazepine receptor, peripheral
MGI:88223	C1qa	complement component 1, q subcomponent, alpha polypeptide
MGI:88225	C1qg	complement component 1, q subcomponent, gamma polypeptide
MGI:88232	C5r1	complement component 5, receptor 1
MGI:88244	S100a8	S100 calcium binding protein A8 (calgranulin A)
MGI:88252	Calr	calreticulin
MGI:88255	Anxa6	annexin A6
MGI:88256	Camk2a	calcium/calmodulin-dependent protein kinase II alpha
MGI:88269	Car2	carbonic anhydrase 2
MGI:88271	Cat	catalase
MGI:88276	Ctnnb1	catenin (cadherin associated protein), beta 1, 88kDa
MGI:88278	Serpina6	serine (or cysteine) peptidase inhibitor, clade A, member 6
MGI:88279	Cbl	Casitas B-lineage lymphoma
MGI:88283	Serpinh1	serine (or cysteine) peptidase inhibitor, clade H, member 1
MGI:88285	Cbs	cystathionine beta-synthase
MGI:88294	Cacna1s	calcium channel, voltage-dependent, L type, alpha 1S subunit
MGI:88313	Ccnd1	cyclin D1
MGI:88320	Cd2	CD2 antigen
MGI:88321	Ms4a1	membrane-spanning 4-domains, subfamily A, member 1
MGI:88322	Cd22	CD22 antigen
MGI:88323	Cd24a	CD24a antigen
MGI:88330	Cd37	CD37 antigen
MGI:88331	Cd3d	CD3 antigen, delta polypeptide
MGI:88332	Cd3e	CD3 antigen, epsilon polypeptide
MGI:88334	Cd3z	CD3 antigen, zeta polypeptide
MGI:88335	Cd4	CD4 antigen
MGI:88338	Cd44	CD44 antigen
MGI:88339	Cd48	CD48 antigen
MGI:88340	Cd5	CD5 antigen
MGI:88341	Cd53	CD53 antigen
MGI:88342	Cd68	CD68 antigen
MGI:88343	Cd69	CD69 antigen
MGI:88346	Cd8a	CD8 antigen, alpha chain
MGI:88347	Cd8b1	CD8 antigen, beta chain 1
MGI:88348	Cd9	CD9 antigen
MGI:88351	Cdc2a	cell division cycle 2 homolog A (S. pombe)
MGI:88354	Cdh1	cadherin 1
MGI:88355	Cdh2	cadherin 2
MGI:88356	Cdh3	cadherin 3
MGI:88357	Cdk4	cyclin-dependent kinase 4
MGI:88362	Cdx4	caudal type homeo box 4
MGI:88373	Cebpb	CCAAT/enhancer binding protein (C/EBP), beta
MGI:88374	Cel	carboxyl ester lipase
MGI:88380	F2	coagulation factor II
MGI:88381	F3	coagulation factor III
MGI:88383	F8	coagulation factor VIII
MGI:88385	Cfh	complement component factor h
MGI:88388	Cftr	cystic fibrosis transmembrane conductance regulator homolog
MGI:88390	Cga	glycoprotein hormones, alpha subunit
MGI:88401	Chx10	C. elegans ceh-10 homeo domain containing homolog
MGI:88407	Ckb	creatine kinase, brain
MGI:88413	Ckm	creatine kinase, muscle
MGI:88423	Clu	clusterin
MGI:88437	Cnp1	cyclic nucleotide phosphodiesterase 1
MGI:88450	Col17a1	procollagen, type XVII, alpha 1
MGI:88451	Col18a1	procollagen, type XVIII, alpha 1
MGI:88467	Col1a1	procollagen, type I, alpha 1
MGI:88468	Col1a2	procollagen, type I, alpha 2
MGI:88470	Comt	catechol-O-methyltransferase
MGI:88479	Cpa3	carboxypeptidase A3, mast cell
MGI:88489	Cr2	complement receptor 2
MGI:88490	Crabp1	cellular retinoic acid binding protein I
MGI:88491	Crabp2	cellular retinoic acid binding protein II
MGI:88492	Masp1	mannan-binding lectin serine peptidase 1
MGI:88494	Creb1	cAMP responsive element binding protein 1
MGI:88496	Crh	corticotropin releasing hormone
MGI:88497	Crhbp	corticotropin releasing hormone binding protein
MGI:88498	Crhr1	corticotropin releasing hormone receptor 1
MGI:88501	Crip1	cysteine-rich protein 1 (intestinal)
MGI:88508	Crk	v-crk sarcoma virus CT10 oncogene homolog (avian)
MGI:88513	Crry	complement receptor related protein
MGI:88529	Cs	citrate synthase
MGI:88547	Csnk2a2	casein kinase II, alpha 2, polypeptide
MGI:88556	Ctla4	cytotoxic T-lymphocyte-associated protein 4
MGI:88557	Pcyt1a	phosphate cytidylyltransferase 1, choline, alpha isoform
MGI:88558	Ctrl	chymotrypsin-like
MGI:88562	Ctsd	cathepsin D
MGI:88564	Ctsl	cathepsin L
MGI:88568	Cutl1	cut-like 1 (Drosophila)
MGI:88574	Cybb	cytochrome b-245, beta polypeptide
MGI:88582	Cyp11a1	cytochrome P450, family 11, subfamily a, polypeptide 1
MGI:88586	Cyp17a1	cytochrome P450, family 17, subfamily a, polypeptide 1
MGI:88587	Cyp19a1	cytochrome P450, family 19, subfamily a, polypeptide 1
MGI:88588	Cyp1a1	cytochrome P450, family 1, subfamily a, polypeptide 1
MGI:88589	Cyp1a2	cytochrome P450, family 1, subfamily a, polypeptide 2
MGI:88590	Cyp1b1	cytochrome P450, family 1, subfamily b, polypeptide 1
MGI:88591	Cyp21a1	cytochrome P450, family 21, subfamily a, polypeptide 1
MGI:88593	Cyp24a1	cytochrome P450, family 24, subfamily a, polypeptide 1
MGI:88594	Cyp27a1	cytochrome P450, family 27, subfamily a, polypeptide 1
MGI:88596	Cyp2a4	cytochrome P450, family 2, subfamily a, polypeptide 4
MGI:88600	Cyp2b9	cytochrome P450, family 2, subfamily b, polypeptide 9
MGI:88606	Cyp2d9	cytochrome P450, family 2, subfamily d, polypeptide 9
MGI:88607	Cyp2e1	cytochrome P450, family 2, subfamily e, polypeptide 1
MGI:88609	Cyp3a11	cytochrome P450, family 3, subfamily a, polypeptide 11
MGI:88613	Cyr61	cysteine rich protein 61
MGI:891971	Serpina1a	serine (or cysteine) peptidase inhibitor, clade A, member 1a
MGI:891999	Adarb1	adenosine deaminase, RNA-specific, B1
MGI:892001	Slc22a6	solute carrier family 22 (organic anion transporter), member 6
MGI:892014	Sfrp1	secreted frizzled-related sequence protein 1
MGI:892019	Klk1	kallikrein 1
MGI:892032	Frzb	frizzled-related protein
MGI:892866	Dgcr2	DiGeorge syndrome critical region gene 2
MGI:892977	Slc26a2	solute carrier family 26 (sulfate transporter), member 2
MGI:892986	Spib	Spi-B transcription factor (Spi-1/PU.1 related)
MGI:892995	Dnajc5	DnaJ (Hsp40) homolog, subfamily C, member 5
MGI:893573	Prap1	proline-rich acidic protein 1
MGI:893575	Plscr1	phospholipid scramblase 1
MGI:893578	Scarb1	scavenger receptor class B, member 1
MGI:893579	Khdrbs1	KH domain containing, RNA binding, signal transduction associated 1
MGI:893580	Prtn3	proteinase 3
MGI:893586	Nhp2l1	NHP2 non-histone chromosome protein 2-like 1 (S. cerevisiae)
MGI:893592	Ager	advanced glycosylation end product-specific receptor
MGI:894288	Sepp1	selenoprotein P, plasma, 1
MGI:894293	Smad4	MAD homolog 4 (Drosophila)
MGI:894311	Pirb	paired-Ig-like receptor B
MGI:894312	Crhr2	corticotropin releasing hormone receptor 2
MGI:894320	Prdx6	peroxiredoxin 6
MGI:894332	Ebf2	early B-cell factor 2
MGI:894657	Serpinb8	serine (or cysteine) peptdiase inhibitor, clade B, member 8
MGI:894667	Serpinb9d	serine (or cysteine) peptidase inhibitor, clade B, member 9d
MGI:894668	Serpinb9b	serine (or cysteine) peptidase inhibitor, clade B, member 9b
MGI:894669	Serpinb9c	serine (or cysteine) peptidase inhibitor, clade B, member 9c
MGI:894676	Mast2	microtubule associated serine/threonine kinase 2
MGI:894678	Aurka	aurora kinase A
MGI:894696	Serping1	serine (or cysteine) peptidase inhibitor, clade G, member 1
MGI:894697	Rad54l	RAD54 like (S. cerevisiae)
MGI:894698	Sgca	sarcoglycan, alpha (dystrophin-associated glycoprotein)
MGI:894701	Mgat5	mannoside acetylglucosaminyltransferase 5
MGI:894702	Numbl	numb-like
MGI:894806	Mylk	myosin, light polypeptide kinase
MGI:93830	Adipor2	adiponectin receptor 2
MGI:94865	Dbi	diazepam binding inhibitor
MGI:94871	Dci	dodecenoyl-Coenzyme A delta isomerase (3,2 trans-enoyl-Coenyme A isomerase)
MGI:94872	Dcn	decorin
MGI:94900	Dlk1	delta-like 1 homolog (Drosophila)
MGI:94902	Dlx2	distal-less homeobox 2
MGI:94909	Dmd	dystrophin, muscular dystrophy
MGI:94912	Dnmt1	DNA methyltransferase (cytosine-5) 1
MGI:94919	Dpp4	dipeptidylpeptidase 4
MGI:94930	Dsg1a	desmoglein 1 alpha
MGI:95275	Ebf1	early B-cell factor 1
MGI:95283	Edn1	endothelin 1
MGI:95286	Eed	embryonic ectoderm development
MGI:95288	Eef2	eukaryotic translation elongation factor 2
MGI:95294	Egfr	epidermal growth factor receptor
MGI:95295	Egr1	early growth response 1
MGI:95296	Egr2	early growth response 2
MGI:95298	Eif1a	eukaryotic translation initiation factor 1A
MGI:95299	Eif2s1	eukaryotic translation initiation factor 2, subunit 1 alpha
MGI:95301	Eif3s10	eukaryotic translation initiation factor 3, subunit 10 (theta)
MGI:95303	Eif4a1	eukaryotic translation initiation factor 4A1
MGI:95305	Eif4e	eukaryotic translation initiation factor 4E
MGI:95317	Eln	elastin
MGI:95321	Emb	embigin
MGI:95392	Eng	endoglin
MGI:95393	Eno1	enolase 1, alpha non-neuron
MGI:95394	Eno2	enolase 2, gamma neuronal
MGI:95403	Stom	stomatin
MGI:95410	Erbb2	v-erb-b2 erythroblastic leukemia viral oncogene homolog 2, neuro/glioblastoma derived oncogene homolog (avian)
MGI:95420	Es1	esterase 1
MGI:95456	Ets2	E26 avian leukemia oncogene 2, 3' domain
MGI:95457	Evi1	ecotropic viral integration site 1
MGI:95476	Fabp3	fatty acid binding protein 3, muscle and heart
MGI:95479	Fabp1	fatty acid binding protein 1, liver
MGI:95480	Fancc	Fanconi anemia, complementation group C
MGI:95481	Ptk2	PTK2 protein tyrosine kinase 2
MGI:95484	Fas	Fas (TNF receptor superfamily member)
MGI:95486	Fbl	fibrillarin
MGI:95490	Fbn2	fibrillin 2
MGI:95494	Fcer1a	Fc receptor, IgE, high affinity I, alpha polypeptide
MGI:95496	Fcer1g	Fc receptor, IgE, high affinity I, gamma polypeptide
MGI:95497	Fcer2a	Fc receptor, IgE, low affinity II, alpha polypeptide
MGI:95498	Fcgr1	Fc receptor, IgG, high affinity I
MGI:95499	Fcgr2b	Fc receptor, IgG, low affinity IIb
MGI:95500	Fcgr3	Fc receptor, IgG, low affinity III
MGI:95513	Fech	ferrochelatase
MGI:95514	Fes	feline sarcoma oncogene
MGI:95515	Fgf1	fibroblast growth factor 1
MGI:95516	Fgf2	fibroblast growth factor 2
MGI:95517	Fgf3	fibroblast growth factor 3
MGI:95518	Fgf4	fibroblast growth factor 4
MGI:95519	Fgf5	fibroblast growth factor 5
MGI:95520	Fgf6	fibroblast growth factor 6
MGI:95521	Fgf7	fibroblast growth factor 7
MGI:95522	Fgfr1	fibroblast growth factor receptor 1
MGI:95523	Fgfr2	fibroblast growth factor receptor 2
MGI:95524	Fgfr3	fibroblast growth factor receptor 3
MGI:95525	Fgfr4	fibroblast growth factor receptor 4
MGI:95526	Fgg	fibrinogen, gamma polypeptide
MGI:95537	Ctgf	connective tissue growth factor
MGI:95541	Fkbp1a	FK506 binding protein 1a
MGI:95542	Fkbp2	FK506 binding protein 2
MGI:95553	Flg	filaggrin
MGI:95556	Flna	filamin, alpha
MGI:95558	Flt1	FMS-like tyrosine kinase 1
MGI:95559	Flt3	FMS-like tyrosine kinase 3
MGI:95560	Flt3l	FMS-like tyrosine kinase 3 ligand
MGI:95561	Flt4	FMS-like tyrosine kinase 4
MGI:95564	Fmr1	fragile X mental retardation syndrome 1 homolog
MGI:95574	Fos	FBJ osteosarcoma oncogene
MGI:95588	Fth1	ferritin heavy chain 1
MGI:95594	Fut4	fucosyltransferase 4
MGI:95595	Fv1	Friend virus susceptibility 1
MGI:95602	Fyn	Fyn proto-oncogene
MGI:95607	G6pc	glucose-6-phosphatase, catalytic
MGI:95618	Gabra6	gamma-aminobutyric acid (GABA-A) receptor, subunit alpha 6
MGI:95623	Gabrg2	gamma-aminobutyric acid (GABA-A) receptor, subunit gamma 2
MGI:95634	Gad2	glutamic acid decarboxylase 2
MGI:95636	Galc	galactosylceramidase
MGI:95637	Gal	galanin
MGI:95639	Gap43	growth associated protein 43
MGI:95654	Gart	phosphoribosylglycinamide formyltransferase
MGI:95660	Gas6	growth arrest specific 6
MGI:95661	Gata1	GATA binding protein 1
MGI:95662	Gata2	GATA binding protein 2
MGI:95663	Gata3	GATA binding protein 3
MGI:95664	Gata4	GATA binding protein 4
MGI:95665	Gba	glucosidase, beta, acid
MGI:95666	Gbp1	guanylate nucleotide binding protein 1
MGI:95669	Gc	group specific component
MGI:95674	Gcg	glucagon
MGI:95675	Gch1	GTP cyclohydrolase 1
MGI:95698	Gfpt1	glutamine fructose-6-phosphate transaminase 1
MGI:95704	Ggta1	glycoprotein galactosyltransferase alpha 1, 3
MGI:95706	Ggt1	gamma-glutamyltransferase 1
MGI:95708	Ghr	growth hormone receptor
MGI:95709	Ghrh	growth hormone releasing hormone
MGI:95710	Ghrhr	growth hormone releasing hormone receptor
MGI:95712	Gpr83	G protein-coupled receptor 83
MGI:95713	Gja1	gap junction membrane channel protein alpha 1
MGI:95714	Gja3	gap junction membrane channel protein alpha 3
MGI:95715	Gja4	gap junction membrane channel protein alpha 4
MGI:95716	Gja5	gap junction membrane channel protein alpha 5
MGI:95719	Gjb1	gap junction membrane channel protein beta 1
MGI:95720	Gjb2	gap junction membrane channel protein beta 2
MGI:95727	Gli1	GLI-Kruppel family member GLI1
MGI:95729	Gli3	GLI-Kruppel family member GLI3
MGI:95742	Glo1	glyoxalase 1
MGI:95755	Slc2a1	solute carrier family 2 (facilitated glucose transporter), member 1
MGI:95757	Slc2a3	solute carrier family 2 (facilitated glucose transporter), member 3
MGI:95758	Slc2a4	solute carrier family 2 (facilitated glucose transporter), member 4
MGI:95760	Slc6a9	solute carrier family 6 (neurotransmitter transporter, glycine), member 9
MGI:95767	Gna12	guanine nucleotide binding protein, alpha 12
MGI:95770	Gna15	guanine nucleotide binding protein, alpha 15
MGI:95771	Gnai1	guanine nucleotide binding protein, alpha inhibiting 1
MGI:95772	Gnai2	guanine nucleotide binding protein, alpha inhibiting 2
MGI:95776	Gnaq	guanine nucleotide binding protein, alpha q polypeptide
MGI:95777	Gnas	GNAS (guanine nucleotide binding protein, alpha stimulating) complex locus
MGI:95778	Gnat1	guanine nucleotide binding protein, alpha transducing 1
MGI:95794	Lrp2	low density lipoprotein receptor-related protein 2
MGI:95797	Gpi1	glucose phosphate isomerase 1
MGI:95806	Aes	amino-terminal enhancer of split
MGI:95808	Gria1	glutamate receptor, ionotropic, AMPA1 (alpha 1)
MGI:95809	Gria2	glutamate receptor, ionotropic, AMPA2 (alpha 2)
MGI:95810	Gria3	glutamate receptor, ionotropic, AMPA3 (alpha 3)
MGI:95813	Grid2	glutamate receptor, ionotropic, delta 2
MGI:95819	Grin1	glutamate receptor, ionotropic, NMDA1 (zeta 1)
MGI:95820	Grin2a	glutamate receptor, ionotropic, NMDA2A (epsilon 1)
MGI:95821	Grin2b	glutamate receptor, ionotropic, NMDA2B (epsilon 2)
MGI:95822	Grin2c	glutamate receptor, ionotropic, NMDA2C (epsilon 3)
MGI:95823	Grin2d	glutamate receptor, ionotropic, NMDA2D (epsilon 4)
MGI:95832	Grn	granulin
MGI:95833	Grp	gastrin releasing peptide
MGI:95834	Pdia3	protein disulfide isomerase associated 3
MGI:95835	Hspa5	heat shock 70kD protein 5 (glucose-regulated protein)
MGI:95852	Gss	glutathione synthetase
MGI:95860	Gstm1	glutathione S-transferase, mu 1
MGI:95862	Gstm4	glutathione S-transferase, mu 4
MGI:95865	Gstp1	glutathione S-transferase, pi 1
MGI:95872	Gusb	glucuronidase, beta
MGI:95886	H13	histocompatibility 13
MGI:95895	H2-Aa	histocompatibility 2, class II antigen A, alpha
MGI:95896	H2-D1	histocompatibility 2, D region locus 1
MGI:95901	H2-Eb1	histocompatibility 2, class II antigen E beta
MGI:95904	H2-K1	histocompatibility 2, K1, K region
MGI:95912	H2-L	histocompatibility 2, D region
MGI:95915	H2-M3	histocompatibility 2, M region locus 3
MGI:95921	H2-DMa	histocompatibility 2, class II, locus DMa
MGI:95922	H2-DMb1	histocompatibility 2, class II, locus Mb1
MGI:95923	H2-DMb2	histocompatibility 2, class II, locus Mb2
MGI:95924	H2-Oa	histocompatibility 2, O region alpha locus
MGI:95928	H2-Q1	histocompatibility 2, Q region locus 1
MGI:95929	H2-Q10	histocompatibility 2, Q region locus 10
MGI:95934	H2-Q5	histocompatibility 2, Q region locus 5
MGI:95994	H47	histocompatibility 47
MGI:96010	Hal	histidine ammonia lyase
MGI:96015	Hba-a1	hemoglobin alpha, adult chain 1
MGI:96027	Hbb-y	hemoglobin Y, beta-like embryonic chain
MGI:96051	Serpind1	serine (or cysteine) peptidase inhibitor, clade D, member 1
MGI:96052	Hck	hemopoietic cell kinase
MGI:96055	Ptpn6	protein tyrosine phosphatase, non-receptor type 6
MGI:96067	Hdh	Huntington disease gene homolog
MGI:96070	Hbegf	heparin-binding EGF-like growth factor
MGI:96071	Hesx1	homeo box gene expressed in ES cells
MGI:96073	Hexa	hexosaminidase A
MGI:96079	Hgf	hepatocyte growth factor
MGI:96080	Mst1	macrophage stimulating 1 (hepatocyte growth factor-like)
MGI:96086	Hhex	hematopoietically expressed homeobox
MGI:96103	Hk1	hexokinase 1
MGI:96112	Hmbs	hydroxymethylbilane synthase
MGI:96113	Hmgb1	high mobility group box 1
MGI:96157	Hmgb2	high mobility group box 2
MGI:96159	Hmgcr	3-hydroxy-3-methylglutaryl-Coenzyme A reductase
MGI:96160	Hmga1	high mobility group AT-hook 1
MGI:96163	Hmox1	heme oxygenase (decycling) 1
[truncated: 463 more rows]
