# Supplementary material for: Transcriptional Profiling Uncovers a Network of Cholesterol-Responsive Atherosclerosis Target Genes
Source: PLoS Genet. 2008 Mar 14;4(3):e1000036. doi: 10.1371/journal.pgen.1000036 (PMC2265530; doi:10.1371/journal.pgen.1000036)
Supplement: Table S10 — Gene list, lesion cluster 3 (0.06 MB XLS) [file pgen.1000036.s011.xls]

## Sheet: Table S10-Lesion cluster3
Table S10 - Gene list, lesion cluster 3
MGI	GeneSymbol	Gene name
MGI:101884	Ppard	peroxisome proliferator activator receptor delta
MGI:101921	Ap2a1	adaptor protein complex AP-2, alpha 1 subunit
MGI:102708	Efnb1	ephrin B1
MGI:102935	Pou6f1	POU domain, class 6, transcription factor 1
MGI:103182	Slc19a1	solute carrier family 19 (sodium/hydrogen exchanger), member 1
MGI:103263	Mcf2l	mcf.2 transforming sequence-like
MGI:104541	Gcdh	glutaryl-Coenzyme A dehydrogenase
MGI:104615	Cnr1	cannabinoid receptor 1 (brain)
MGI:104664	Tcf15	transcription factor 15
MGI:104689	Cct4	chaperonin subunit 4 (delta)
MGI:104740	Ppara	peroxisome proliferator activated receptor alpha
MGI:104796	Ltb	lymphotoxin B
MGI:104995	Gclm	glutamate-cysteine ligase , modifier subunit
MGI:105049	P2ry1	purinergic receptor P2Y, G-protein coupled 1
MGI:105107	P2ry2	purinergic receptor P2Y, G-protein coupled 2
MGI:105305	Slc1a5	solute carrier family 1 (neutral amino acid transporter), member 5
MGI:105311	Efs	embryonal Fyn-associated substrate
MGI:106013	Slc16a1	solute carrier family 16 (monocarboxylic acid transporters), member 1
MGI:106281	D17Wsu92e	DNA segment, Chr 17, Wayne State University 92, expressed
MGI:106604	Gpld1	glycosylphosphatidylinositol specific phospholipase D1
MGI:107318	D5Wsu148e	DNA segment, Chr 5, Wayne State University 148, expressed
MGI:107428	Gtl3	gene trap locus 3
MGI:107471	Notch4	Notch gene homolog 4 (Drosophila)
MGI:107585	Srebf2	sterol regulatory element binding factor 2
MGI:107674	Cd1d1	CD1d1 antigen
MGI:108037	Figf	c-fos induced growth factor
MGI:108062	Siah2	seven in absentia 2
MGI:108109	Ywhag	3-monooxygenase/tryptophan 5-monooxygenase activation protein, gamma polypeptide
MGI:108414	Pafah1b3	platelet-activating factor acetylhydrolase, isoform 1b, alpha1 subunit
MGI:109198	Eif4ebp2	eukaryotic translation initiation factor 4E binding protein 2
MGI:109320	Mmp15	matrix metallopeptidase 15
MGI:109562	Cmkor1	chemokine orphan receptor 1
MGI:109573	Tep1	telomerase associated protein 1
MGI:109591	Nfic	nuclear factor I/C
MGI:1096574	Car4	carbonic anhydrase 4
MGI:1098219	Hmgb3	high mobility group box 3
MGI:1098234	Adprh	ADP-ribosylarginine hydrolase
MGI:1098270	Jag2	jagged 2
MGI:1100868	Tbrg4	transforming growth factor beta regulated gene 4
MGI:1101779	Thbs4	thrombospondin 4
MGI:1194882	Irs3	insulin receptor substrate 3
MGI:1197518	Aatk	apoptosis-associated tyrosine kinase
MGI:1202880	Traf4	Tnf receptor associated factor 4
MGI:1261855	D10Ertd214e	DNA segment, Chr 10, ERATO Doi 214, expressed
MGI:1270156	Sept4	septin 4
MGI:1270848	Rasd1	RAS, dexamethasone-induced 1
MGI:1276121	Bckdk	branched chain ketoacid dehydrogenase kinase
MGI:1277143	Gtf2h3	general transcription factor IIH, polypeptide 3
MGI:1277151	Snca	synuclein, alpha
MGI:1289160	Eva1	epithelial V-like antigen 1
MGI:1289168	Cd300lg	CD300 antigen like family member G
MGI:1298377	Itgae	integrin, alpha E, epithelial-associated
MGI:1306797	Aoc3	amine oxidase, copper containing 3
MGI:1313277	Vamp2	vesicle-associated membrane protein 2
MGI:1314647	Aqp7	aquaporin 7
MGI:1333115	Tpt1h	tRNA splicing 2' phosphotransferase 1 homolog (S. cerevisiae)
MGI:1333822	Itpka	inositol 1,4,5-trisphosphate 3-kinase A
MGI:1333825	Dgat1	diacylglycerol O-acyltransferase 1
MGI:1333874	Dedd	death effector domain-containing
MGI:1334433	Pik4cb	phosphatidylinositol 4-kinase, catalytic, beta polypeptide
MGI:1336186	Agpat3	1-acylglycerol-3-phosphate O-acyltransferase 3
MGI:1337065	Ap4s1	adaptor-related protein complex AP-4, sigma 1
MGI:1338011	Auh	AU RNA binding protein/enoyl-coenzyme A hydratase
MGI:1338015	Sort1	sortilin 1
MGI:1338045	Ctsw	cathepsin W
MGI:1338788	Pex11a	peroxisomal biogenesis factor 11a
MGI:1338800	Bpnt1	bisphosphate 3'-nucleotidase 1
MGI:1340051	Gpr56	G protein-coupled receptor 56
MGI:1341044	Thoc4	THO complex 4
MGI:1341793	Pbx2	pre B-cell leukemia transcription factor 2
MGI:1343087	Pdk2	pyruvate dehydrogenase kinase, isoenzyme 2
MGI:1343176	Timm17b	translocase of inner mitochondrial membrane 17b
MGI:1344341	Car14	carbonic anhydrase 14
MGI:1345279	Slc11a2	solute carrier family 11 (proton-coupled divalent metal ion transporters), member 2
MGI:1346016	Rgnef	Rho-guanine nucleotide exchange factor
MGI:1346042	Mgll	monoglyceride lipase
MGI:1346086	Agtrl1	angiotensin receptor-like 1
MGI:1346526	Psmb9	proteosome (prosome, macropain) subunit, beta type 9 (large multifunctional peptidase 2)
MGI:1346527	Psmb8	proteosome (prosome, macropain) subunit, beta type 8 (large multifunctional peptidase 7)
MGI:1346865	Mapk14	mitogen activated protein kinase 14
MGI:1346867	Map2k2	mitogen activated protein kinase kinase 2
MGI:1347023	Txnrd2	thioredoxin reductase 2
MGI:1347055	Vnn3	vanin 3
MGI:1349217	Abcd4	ATP-binding cassette, sub-family D (ALD), member 4
MGI:1351477	Cars	cysteinyl-tRNA synthetase
MGI:1351627	Pdhx	pyruvate dehydrogenase complex, component X
MGI:1353418	Pmm1	phosphomannomutase 1
MGI:1353589	Cbx8	chromobox homolog 8 (Drosophila Pc class)
MGI:1354170	Dos	downstream of Stk11
MGI:1354367	Mrps7	mitchondrial ribosomal protein S7
MGI:1855694	G1p2	interferon, alpha-inducible protein
MGI:1858225	Tuba8	tubulin, alpha 8
MGI:1858496	Deaf1	deformed epidermal autoregulatory factor 1 (Drosophila)
MGI:1858732	Keap1	kelch-like ECH-associated protein 1
MGI:1858910	Ptdsr	phosphatidylserine receptor
MGI:1861452	Pigo	phosphatidylinositol glycan, class O
MGI:1888712	Cxcl7	chemokine (C-X-C motif) ligand 7
MGI:1888984	Tbx21	T-box 21
MGI:1889295	Eral1	Era (G-protein)-like 1 (E. coli)
MGI:1889817	Repin1	replication initiator 1
MGI:1890212	Porcn	porcupine homolog (Drosophila)
MGI:1891749	Wdr8	WD repeat domain 8
MGI:1913105	Slc28a2	solute carrier family 28 (sodium-coupled nucleoside transporter), member 2
MGI:1913408	Cxx1a	CAAX box 1 homolog A (human)
MGI:1913600	Pla2g12a	phospholipase A2, group XIIA
MGI:1913775	Timm50	translocase of inner mitochondrial membrane 50 homolog (yeast)
MGI:1913788	2510038A11Rik	RIKEN cDNA 2510038A11 gene
MGI:1913837	Fastk	Fas-activated serine/threonine kinase
MGI:1913862	Ormdl3	ORM1-like 3 (S. cerevisiae)
MGI:1913876	5730403B10Rik	RIKEN cDNA 5730403B10 gene
MGI:1913879	Golph3	golgi phosphoprotein 3
MGI:1913897	Ndnl2	necdin-like 2
MGI:1914071	Bcs1l	BCS1-like (yeast)
MGI:1914198	Acad8	acyl-Coenzyme A dehydrogenase family, member 8
MGI:1914272	Acad9	acyl-Coenzyme A dehydrogenase family, member 9
MGI:1914286	Mrpl45	mitochondrial ribosomal protein L45
MGI:1914345	2310001H13Rik	RIKEN cDNA 2310001H13 gene
MGI:1914346	1810037K07Rik	RIKEN cDNA 1810037K07 gene
MGI:1914460	Gatad1	GATA zinc finger domain containing 1
MGI:1914467	2810055F11Rik	RIKEN cDNA 2810055F11 gene
MGI:1914639	1110035L05Rik	RIKEN cDNA 1110035L05 gene
MGI:1914660	4930449I24Rik	RIKEN cDNA 4930449I24 gene
MGI:1914667	3230401I01Rik	RIKEN cDNA 3230401I01 gene
MGI:1914692	0610039N19Rik	RIKEN cDNA 0610039N19 gene
MGI:1914714	Entpd4	ectonucleoside triphosphate diphosphohydrolase 4
MGI:1914739	1810038H16Rik	RIKEN cDNA 1810038H16 gene
MGI:1914788	Zswim3	zinc finger, SWIM domain containing 3
MGI:1914855	Akt1s1	AKT1 substrate 1 (proline-rich)
MGI:1914943	2310003F16Rik	RIKEN cDNA 2310003F16 gene
MGI:1915090	Mrp63	mitochondrial ribosomal protein 63
MGI:1915167	Zcchc3	zinc finger, CCHC domain containing 3
MGI:1915213	Npc2	Niemann Pick type C2
MGI:1915219	2700080J24Rik	RIKEN cDNA 2700080J24 gene
MGI:1915237	Ppcs	phosphopantothenoylcysteine synthetase
MGI:1915260	Bambi	BMP and activin membrane-bound inhibitor, homolog (Xenopus laevis)
MGI:1915408	Gpsn2	glycoprotein, synaptic 2
MGI:1915464	Gsto2	glutathione S-transferase omega 2
MGI:1915467	Bat2	HLA-B associated transcript 2
MGI:1915517	Slc25a22	solute carrier family 25 (mitochondrial carrier, glutamate), member 22
MGI:1915582	0610010E21Rik	RIKEN cDNA 0610010E21 gene
MGI:1915600	0610009K11Rik	RIKEN cDNA 0610009K11 gene
MGI:1915609	0610010K14Rik	RIKEN cDNA 0610010K14 gene
MGI:1916012	1110038O08Rik	RIKEN cDNA 1110038O08 gene
MGI:1916091	1110054M08Rik	RIKEN cDNA 1110054M08 gene
MGI:1916165	Vars2l	valyl-tRNA synthetase 2-like
MGI:1916321	1810014L12Rik	RIKEN cDNA 1810014L12 gene
MGI:1916679	Me3	malic enzyme 3, NADP(+)-dependent, mitochondrial
MGI:1916686	1700020C11Rik	RIKEN cDNA 1700020C11 gene
MGI:1916740	Zfp524	zinc finger protein 524
MGI:1916847	Afg3l2	AFG3(ATPase family gene 3)-like 2 (yeast)
MGI:1916881	2310014F07Rik	RIKEN cDNA 2310014F07 gene
MGI:1916884	Clybl	citrate lyase beta like
MGI:1916969	Cad	carbamoyl-phosphate synthetase 2, aspartate transcarbamylase, and dihydroorotase
MGI:1917056	Slc39a11	solute carrier family 39 (metal ion transporter), member 11
MGI:1917167	2610036N15Rik	RIKEN cDNA 2610036N15 gene
MGI:1917370	Yars2	tyrosyl-tRNA synthetase 2 (mitochondrial)
MGI:1917806	5730438N18Rik	RIKEN cDNA 5730438N18 gene
MGI:1917942	3830422K02Rik	RIKEN cDNA 3830422K02 gene
MGI:1918214	4931418L13Rik	RIKEN cDNA 4931418L13 gene
MGI:1918366	Stx18	syntaxin 18
MGI:1918480	Dym	dymeclin
MGI:1918611	Amid	apoptosis-inducing factor (AIF)-like mitochondrion-associated inducer of death
MGI:1918920	Acy3	aspartoacylase (aminoacylase) 3
MGI:1918957	Ubiad1	UbiA prenyltransferase domain containing 1
MGI:1918996	Rgl3	ral guanine nucleotide dissociation stimulator-like 3
MGI:1919006	Cpn2	carboxypeptidase N, polypeptide 2
MGI:1919007	1300018J18Rik	RIKEN cDNA 1300018J18 gene
MGI:1919008	1300010F03Rik	RIKEN cDNA 1300010F03 gene
MGI:1919065	2810414N06Rik	RIKEN cDNA 2810414N06 gene
MGI:1919135	2310003H01Rik	RIKEN cDNA 2310003H01 gene
MGI:1919163	2310042N02Rik	RIKEN cDNA 2310042N02 gene
MGI:1919191	2310051N18Rik	RIKEN cDNA 2310051N18 gene
MGI:1919234	Sars2	seryl-aminoacyl-tRNA synthetase 2
MGI:1919235	Acad10	acyl-Coenzyme A dehydrogenase family, member 10
MGI:1919397	Btbd4	BTB (POZ) domain containing 4
MGI:1919444	Fbxl20	F-box and leucine-rich repeat protein 20
MGI:1919666	Lrpprc	leucine-rich PPR-motif containing
MGI:1919794	Exosc6	exosome component 6
MGI:1919878	2700086A05Rik	RIKEN cDNA 2700086A05 gene
MGI:1919898	2700081L22Rik	RIKEN cDNA 2700081L22 gene
MGI:1920037	Tmem48	transmembrane protein 48
MGI:1920194	2900026A02Rik	RIKEN cDNA 2900026A02 gene
MGI:1920317	3110005G23Rik	RIKEN cDNA 3110005G23 gene
MGI:1920345	2900084M01Rik	RIKEN cDNA 2900084M01 gene
MGI:1920389	Prr6	proline-rich polypeptide 6
MGI:1920537	1700040L02Rik	RIKEN cDNA 1700040L02 gene
MGI:1920566	Calr3	calreticulin 3
MGI:1920905	Pex11c	peroxisomal biogenesis factor 11c
MGI:1921078	Wdr21	WD repeat domain 21
MGI:1921394	Robo4	roundabout homolog 4 (Drosophila)
MGI:1921398	1300001I01Rik	RIKEN cDNA 1300001I01 gene
MGI:1921585	Xrcc3	X-ray repair complementing defective repair in Chinese hamster cells 3
MGI:1921593	4632407F12Rik	RIKEN cDNA 4632407F12 gene
MGI:1922107	4930448O17Rik	RIKEN cDNA 4930448O17 gene
MGI:1922332	4930519N06Rik	RIKEN cDNA 4930519N06 gene
MGI:1922802	Paqr9	progestin and adipoQ receptor family member IX
MGI:1922920	Ushbp1	Usher syndrome 1C binding protein 1
MGI:1923029	4930402H24Rik	RIKEN cDNA 4930402H24 gene
MGI:1923340	5830454J16Rik	RIKEN cDNA 5830454J16 gene
MGI:1923576	Exosc4	exosome component 4
MGI:1923725	2310079P10Rik	RIKEN cDNA 2310079P10 gene
MGI:1923813	Qrsl1	glutaminyl-tRNA synthase (glutamine-hydrolyzing)-like 1
MGI:1924575	9430029L20Rik	RIKEN cDNA 9430029L20 gene
MGI:1925152	Prune	prune homolog (Drosophila)
MGI:1925288	Mccc2	methylcrotonoyl-Coenzyme A carboxylase 2 (beta)
MGI:1925528	5330420D20Rik	RIKEN cDNA 5330420D20 gene
MGI:1925537	Zfyve20	zinc finger, FYVE domain containing 20
MGI:1925558	Gpr108	G protein-coupled receptor 108
MGI:1926144	Aacs	acetoacetyl-CoA synthetase
MGI:1926170	Dlst	dihydrolipoamide S-succinyltransferase (E2 component of 2-oxo-glutarate complex)
MGI:1926274	Mrpl19	mitochondrial ribosomal protein L19
MGI:1926424	Th1l	TH1-like homolog (Drosophila)
MGI:1927231	Zfp261	zinc finger protein 261
MGI:1927576	B230317C12Rik	RIKEN cDNA B230317C12 gene
MGI:1928378	Dhodh	dihydroorotate dehydrogenase
MGI:1928485	Mlycd	malonyl-CoA decarboxylase
MGI:1928858	Krt2-19	keratin complex 2, basic, gene 19
MGI:1929260	Mtch2	mitochondrial carrier homolog 2 (C. elegans)
MGI:1929269	Tmed2	transmembrane emp24 domain trafficking protein 2
MGI:1929293	Cib2	calcium and integrin binding family member 2
MGI:1929474	Cyp2d22	cytochrome P450, family 2, subfamily d, polypeptide 22
MGI:1929596	Prrg2	proline-rich Gla (G-carboxyglutamic acid) polypeptide 2
MGI:1929657	1600020H07Rik	RIKEN cDNA 1600020H07 gene
MGI:1929763	Cdc42ep1	CDC42 effector protein (Rho GTPase binding) 1
MGI:1932466	AV071179	expressed sequence AV071179
MGI:1933289	Gtf2a2	general transcription factor II A, 2
MGI:1933966	Mcam	melanoma cell adhesion molecule
MGI:2137022	Tm2d1	TM2 domain containing 1
MGI:2137026	P2rx5	purinergic receptor P2X, ligand-gated ion channel, 5
MGI:2137228	Mrpl36	mitochondrial ribosomal protein L36
MGI:2137229	Mrpl43	mitochondrial ribosomal protein L43
MGI:2138209	AI325464	expressed sequence AI325464
MGI:2138935	C230093N12Rik	RIKEN cDNA C230093N12 gene
MGI:2138994	Pomt1	protein-O-mannosyltransferase 1
MGI:2140175	Ldlrap1	low density lipoprotein receptor adaptor protein 1
MGI:2140300	AI464131	expressed sequence AI464131
MGI:2140967	Mapre3	microtubule-associated protein, RP/EB family, member 3
MGI:2144564	5730593F17Rik	RIKEN cDNA 5730593F17 gene
MGI:2144724	Ttc7b	tetratricopeptide repeat domain 7B
MGI:2144726	Tmem11	transmembrane protein 11
MGI:2145363	AU022746	expressed sequence AU022746
MGI:2145814	Ppif	peptidylprolyl isomerase F (cyclophilin F)
MGI:2146110	E430025E21Rik	RIKEN cDNA E430025E21 gene
MGI:2146620	Srl	sarcalumenin
MGI:2146757	AA409289	expressed sequence AA409289
MGI:2147274	Centd3	centaurin, delta 3
MGI:2147577	Gpr120	G protein-coupled receptor 120
MGI:2149728	Impa2	inositol (myo)-1(or 4)-monophosphatase 2
MGI:2150641	Edg8	endothelial differentiation, sphingolipid G-protein-coupled receptor, 8
MGI:2152819	B3galt6	UDP-Gal:betaGal beta 1,3-galactosyltransferase, polypeptide 6
MGI:2153045	Elmo2	engulfment and cell motility 2, ced-12 homolog (C. elegans)
MGI:2153049	Klf16	Kruppel-like factor 16
MGI:2156528	Elovl6	ELOVL family member 6, elongation of long chain fatty acids (yeast)
MGI:2176159	Cyp26b1	cytochrome P450, family 26, subfamily b, polypeptide 1
MGI:2177151	Cd99l2	Cd99 antigen-like 2
MGI:2178323	Clstn3	calsyntenin 3
MGI:2182607	Sdsl	serine dehydratase-like
MGI:2183151	Med9	mediator of RNA polymerase II transcription, subunit 9 homolog (yeast)
MGI:2384582	BC026432	cDNA sequence BC026432
MGI:2384781	Tspan10	tetraspanin 10
MGI:2384996	Lrrc3b	leucine rich repeat containing 3B
MGI:2385030	BC031593	cDNA sequence BC031593
MGI:2385618	Mmrn2	multimerin 2
MGI:2385619	Klhl12	kelch-like 12 (Drosophila)
MGI:2387201	Yrdc	yrdC domain containing (E.coli)
MGI:2387215	Spfh2	SPFH domain family, member 2
MGI:2441992	Gpr4	G protein-coupled receptor 4
MGI:2442168	Adprhl1	ADP-ribosylhydrolase like 1
MGI:2442184	Flcn	folliculin
MGI:2442939	4732466D17Rik	RIKEN cDNA 4732466D17 gene
MGI:2443597	C730025P13Rik	RIKEN cDNA C730025P13 gene
MGI:2443625	9330121K16Rik	RIKEN cDNA 9330121K16 gene
MGI:2443883	Aldh4a1	aldehyde dehydrogenase 4 family, member A1
MGI:2444773	D430028G21Rik	RIKEN cDNA D430028G21 gene
MGI:2445179	4732495E13Rik	RIKEN cDNA 4732495E13 gene
MGI:2446117	Suox	sulfite oxidase
MGI:2446186	Lpgat1	lysophosphatidylglycerol acyltransferase 1
MGI:2447776	BC034068	cDNA sequence BC034068
MGI:2448532	BC038311	cDNA sequence BC038311
MGI:2652816	BC022224	cDNA sequence BC022224
MGI:2652817	Mtmr11	myotubularin related protein 11
MGI:2652878	Tbc1d16	TBC1 domain family, member 16
MGI:2661375	Rtn4rl1	reticulon 4 receptor-like 1
MGI:2667663	BC027174	cDNA sequence BC027174
MGI:2672904	BC034090	cDNA sequence BC034090
MGI:2677849	Ccbl2	cysteine conjugate-beta lyase 2
MGI:2681842	Igsf21	immunoglobin superfamily, member 21
MGI:2684789	Lrsam1	leucine rich repeat and sterile alpha motif containing 1
MGI:2685012	Gm166	gene model 166, (NCBI)
MGI:3026969	4933429D07Rik	RIKEN cDNA 4933429D07 gene
MGI:3027899	BC052883	cDNA sequence BC052883
MGI:3036248	A330102K04Rik	RIKEN cDNA A330102K04 gene
MGI:3040675	BC038331	cDNA sequence BC038331
MGI:3041174	A230051G13Rik	RIKEN cDNA A230051G13 gene
MGI:3043522	9130218O11Rik	RIKEN cDNA 9130218O11 gene
MGI:3045421	Ank	progressive ankylosis
MGI:87917	Adcy6	adenylate cyclase 6
MGI:87937	Adrb1	adrenergic receptor, beta 1
MGI:87939	Adrb3	adrenergic receptor, beta 3
MGI:87990	Alas2	aminolevulinic acid synthase 2, erythroid
MGI:88110	Atp2a2	ATPase, Ca++ transporting, cardiac muscle, slow twitch 2
MGI:88269	Car2	carbonic anhydrase 2
MGI:88284	Cbr1	carbonyl reductase 1
MGI:88373	Cebpb	CCAAT/enhancer binding protein (C/EBP), beta
MGI:893578	Scarb1	scavenger receptor class B, member 1
MGI:894320	Prdx6	peroxiredoxin 6
MGI:93830	Adipor2	adiponectin receptor 2
MGI:95304	Eif4b	eukaryotic translation initiation factor 4B
MGI:95403	Stom	stomatin
MGI:95522	Fgfr1	fibroblast growth factor receptor 1
MGI:95558	Flt1	FMS-like tyrosine kinase 1
MGI:95660	Gas6	growth arrest specific 6
MGI:95757	Slc2a3	solute carrier family 2 (facilitated glucose transporter), member 3
MGI:95758	Slc2a4	solute carrier family 2 (facilitated glucose transporter), member 4
MGI:96112	Hmbs	hydroxymethylbilane synthase
MGI:96175	Hoxa3	homeo box A3
MGI:96433	Igf1r	insulin-like growth factor I receptor
MGI:96683	Kdr	kinase insert domain protein receptor
MGI:97011	Mmp9	matrix metallopeptidase 9
MGI:97180	Mapt	microtubule-associated protein tau
MGI:97362	Nos3	nitric oxide synthase 3, endothelial cell
MGI:97385	Ntrk3	neurotrophic tyrosine kinase, receptor, type 3
MGI:97520	Pcx	pyruvate carboxylase
MGI:97523	Pde1b	phosphodiesterase 1B, Ca2+-calmodulin dependent
MGI:97531	Pdgfrb	platelet derived growth factor receptor, beta polypeptide
MGI:97572	Phb	prohibitin
MGI:97747	Pparg	peroxisome proliferator activated receptor gamma
MGI:97793	Ptger1	prostaglandin E receptor 1 (subtype EP1)
MGI:97795	Ptger3	prostaglandin E receptor 3 (subtype EP3)
MGI:97822	Pvrl2	poliovirus receptor-related 2
MGI:98159	Rps6	ribosomal protein S6
MGI:98216	Rxrg	retinoid X receptor gamma
MGI:98218	Prrx2	paired related homeobox 2
MGI:98299	Shmt1	serine hydroxymethyl transferase 1 (soluble)
MGI:98940	Vtn	vitronectin
MGI:98957	Wnt4	wingless-related MMTV integration site 4
MGI:99401	Adora1	adenosine A1 receptor
MGI:99600	Aldh2	aldehyde dehydrogenase 2, mitochondrial
