# Supplementary material for: Transcriptional Profiling Uncovers a Network of Cholesterol-Responsive Atherosclerosis Target Genes
Source: PLoS Genet. 2008 Mar 14;4(3):e1000036. doi: 10.1371/journal.pgen.1000036 (PMC2265530; doi:10.1371/journal.pgen.1000036)
Supplement: Table S23 — Transcription factors in lesion cluster 2 (0.01 MB XLS) [file pgen.1000036.s024.xls]

## Sheet: Table S23 -TF Lesion cluster 2
Table S23 - Transcription factors in lesion cluster 2
MGI	Gene Symbol	Gene Name
MGI:103296	Nfatc3	nuclear factor of activated T-cells, cytoplasmic, calcineurin-dependent 3
MGI:1196624	Tcea1	transcription elongation factor A (SII) 1
MGI:1890077	Foxo1	forkhead box O1
MGI:1890378	Zfp110	zinc finger protein 110
MGI:2444737	Fem1c	fem-1 homolog c (C.elegans)
MGI:99150	Yy1	YY1 transcription factor
MGI:99445	Mtpn	myotrophin
MGI:99458	Mef2c	myocyte enhancer factor 2C
MGI:99532	Mef2a	myocyte enhancer factor 2A
